# Supplementary material for: UVR8-mediated inhibition of shade avoidance involves HFR1 stabilization in Arabidopsis
Source: PLoS Genet. 2020 May 11;16(5):e1008797. doi: 10.1371/journal.pgen.1008797 (PMC7241853; doi:10.1371/journal.pgen.1008797)
Supplement: S3 Table — (XLSX) [file pgen.1008797.s008.xlsx]

## Sheet: Feuil1
S3 Table: Intersection of genes upregulated by low R:FR and repressed by UVB in wild type and genes upregulated by low R:FR and not repressed by UVB in hfr1-101 mutant (lists corresponding to Fig 2C).
Col_FR/WL_up_UVB/FR_down_ and hfr1_FR/WL_up not UVB/FR_down : 44 genes
hfr1_FR/WL_up_UVB/FR_not_down: 111 genes
Col_FR/WL_up_UVB/FR_down: 197 genes
Col_FR/WL_up_UVB/FR_down and hfr1_FR/WL_up not UVB/FR_down
	Col_FR/WL			Col_FR/UVB_FR/WL			hfr1_FR/WL			hfr1_FR/UVB_FR/WL
AGI	Col_FR/WL_FC	pvalue	pvalue_with_FDR	Col_FR/UVB_vs_FR/WL_FC	pvalue	pvalue_with_FDR	hfr1_FR/WL_FC	pvalue	pvalue_with_FDR	hfr1_FR/UVB_vs_FR/WL_FC	pvalue	pvalue_with_FDR	Name/AGI	Description
AT4G31370	117.008	1.28795e-23	6.73789e-21	-7.45767	1.7479e-11	1.70282e-10	46.6096	2.33663e-23	1.01867e-20	-1.742	0.0204892	0.0453424	EXO	Phosphate-responsive 1 family protein
AT2G46970	81.9843	1.30412e-151	2.729e-147	-2.8194	2.84036e-18	5.61259e-17	88.861	1.78612e-168	3.73764e-164	1.09541	0.422781	0.545815	PIL1/AtbHLH124	phytochrome interacting factor 3-like 1
AT4G31380	52.5532	2.11478e-59	7.37566e-56	-5.12922	5.20557e-18	9.93904e-17	42.0282	7.35421e-59	2.5649e-55	-1.08845	0.625614	0.726866	FLP1	FPF1-like protein 1
AT5G07010	48.4875	1.10127e-35	1.2129e-32	-16.049	4.04108e-22	1.09823e-20	165.046	4.61028e-51	1.07194e-47	-1.75257	0.0276195	0.0585756	ATST2A	sulfotransferase 2A
AT1G15050	28.7864	2.70404e-26	1.66426e-23	-5.23863	1.48196e-11	1.45663e-10	22.061	4.80991e-25	2.39648e-22	-1.48983	0.0616878	0.115432	IAA34	indole-3-acetic acid inducible 34
AT1G02340	20.3518	1.46521e-77	7.66525e-74	-2.31405	9.40512e-10	7.3906e-09	26.6069	2.8377e-88	1.48454e-84	1.28668	0.0595683	0.112202	HFR1/FBI1/REP1/RSF1/AtbHLH26	basic helix-loop-helix (bHLH) DNA-binding superfamily protein
AT5G18050	11.1004	1.59116e-31	1.44768e-28	-5.49242	7.32946e-19	1.52008e-17	5.8894	6.46691e-20	1.96125e-17	-1.97841	0.000128809	0.000528004	SAUR22	SAUR-like auxin-responsive protein family
AT4G16780	9.41676	1.55111e-122	1.62293e-118	-2.61592	1.42037e-29	5.79391e-28	14.0272	2.65316e-163	2.77601e-159	-1.7314	2.03033e-11	2.63402e-10	ATHB-2	homeobox protein 2
AT5G18060	8.68898	2.07535e-28	1.40093e-25	-4.63914	4.03912e-17	7.13873e-16	5.60868	4.44492e-20	1.38828e-17	-1.98618	5.42619e-05	0.000242779	SAUR23	SAUR-like auxin-responsive protein family
AT2G46990	6.59794	0.000238912	0.00563638	-3.48164	0.0062059	0.0144406	9.63067	0.000140339	0.00313418	-2.64372	0.0309738	0.0643887	IAA20	indole-3-acetic acid inducible 20
AT1G15580	6.33278	3.93885e-13	5.76395e-11	-4.1255	5.89552e-09	4.15806e-08	2.63981	9.182e-05	0.00220853	-1.93466	0.00562522	0.0148254	IAA5	indole-3-acetic acid inducible 5
AT2G22810	6.21752	9.42074e-17	2.03235e-14	-3.71276	5.29869e-10	4.30603e-09	2.75269	2.00261e-06	8.21697e-05	-1.69435	0.0103952	0.0251392	ACS4	1-aminocyclopropane-1-carboxylate synthase 4
AT1G06340	5.79262	0.00153113	0.0241087	-4.68431	0.00387496	0.00952512	5.0273	0.00394291	0.044903	-2.51348	0.0579535	0.10966	T2D23.4	Plant Tudor-like protein
AT5G18030	4.96179	9.27833e-19	2.52154e-16	-2.45677	2.05474e-07	1.16841e-06	3.02337	3.25388e-10	2.8852e-08	-1.19429	0.292399	0.410896	SAUR-like	SAUR-like auxin-responsive protein family
AT5G18080	4.61669	1.00827e-21	4.05752e-19	-2.48215	2.17463e-09	1.62291e-08	3.25827	5.06196e-14	8.08599e-12	-1.38389	0.0274738	0.0583256	SAUR24	SAUR-like auxin-responsive protein family
AT2G18969	4.40667	1.02862e-15	1.99305e-13	-2.09342	2.11503e-05	8.44963e-05	4.43576	2.67204e-15	4.94824e-13	-1.48691	0.0201005	0.0445905	AT2G18969	BEST Arabidopsis thaliana protein match is: sequence-specific DNA binding transcription factors;transcription regulators (TAIR:AT4G30180.1); Has 30201 Blast hits to 17322 proteins in 780 species: Archae - 12; Bacteria - 1396; Metazoa - 17338; Fungi /.../; Plants - 5037; Viruses - 0; Other Eukaryotes - 2996 (source: NCBI BLink).
AT2G20835	4.30468	5.73597e-12	7.06064e-10	-2.58709	2.66806e-06	1.25268e-05	4.1656	1.31492e-11	1.46362e-09	-1.8447	0.00174017	0.00531072	AT2G20835/F5H14.1	unknown protein; BEST Arabidopsis thaliana protein match is: unknown protein (TAIR:AT3G15534.1); Has 66 Blast hits to 66 proteins in 12 species: Archae - 0; Bacteria - 0; Metazoa - 0; Fungi - 0; Plants - 66; Viruses - 0; Other Eukaryotes - 0 (source /.../ BLink).
AT4G13260	4.1886	1.41625e-16	2.9343e-14	-3.37506	6.4448e-13	7.52589e-12	3.24097	1.9422e-12	2.41919e-10	-1.9807	1.64686e-05	8.28419e-05	YUC2	Flavin-binding monooxygenase family protein
AT4G38400	4.13359	1.26631e-19	3.68039e-17	-2.7255	3.48851e-11	3.26917e-10	2.73235	5.38739e-11	5.36841e-09	-1.95029	6.72569e-06	3.62643e-05	ATEXLA2	expansin-like A2
AT5G07000	4.11575	9.59831e-23	4.46343e-20	-2.43415	2.15019e-10	1.84254e-09	4.22262	1.98614e-23	8.84299e-21	-1.36845	0.0222339	0.0486324	ATST2B	sulfotransferase 2B
AT5G18020	4.02995	3.00717e-17	6.91518e-15	-2.30492	1.50173e-07	8.69299e-07	2.7828	2.85226e-10	2.5507e-08	-1.10966	0.501445	0.619179	SAUR20	SAUR-like auxin-responsive protein family
AT3G23030	3.77676	2.70091e-24	1.56998e-21	-2.18338	9.36054e-10	7.36109e-09	3.07927	3.59448e-18	9.28618e-16	-1.65452	6.89425e-05	0.000301818	IAA2	indole-3-acetic acid inducible 2
AT2G44910	3.5555	5.31629e-10	5.12667e-08	-8.58774	1.53925e-19	3.44495e-18	4.6387	9.6376e-15	1.68064e-12	-1.85568	0.000316339	0.00117622	ATHB4	homeobox-leucine zipper protein 4
AT3G50340	3.50073	1.60057e-20	5.49074e-18	-4.22504	5.92734e-26	2.02672e-24	2.35473	1.4756e-10	1.37238e-08	-1.99141	1.72443e-07	1.24047e-06	F11C1_180	unknown protein; BEST Arabidopsis thaliana protein match is: unknown protein (TAIR:AT5G67020.1); Has 128 Blast hits to 128 proteins in 39 species: Archae - 0; Bacteria - 46; Metazoa - 0; Fungi - 3; Plants - 76; Viruses - 0; Other Eukaryotes - 3 (sou /.../CBI BLink).
AT4G14560	3.3822	3.1305e-22	1.28449e-19	-2.27105	2.03025e-11	1.95784e-10	2.04808	6.42001e-09	4.76402e-07	-1.34805	0.012959	0.0305167	IAA1	indole-3-acetic acid inducible
AT3G54200	3.22585	1.68202e-23	8.58487e-21	-3.11607	2.65068e-22	7.32735e-21	3.13635	2.00635e-22	8.39696e-20	-1.78035	3.66125e-07	2.50213e-06	F24B22.160	Late embryogenesis abundant (LEA) hydroxyproline-rich glycoprotein family
AT2G39980	3.20628	3.5438e-16	7.13054e-14	-2.43946	2.2917e-10	1.95023e-09	3.94097	3.39501e-21	1.20019e-18	-1.42186	0.0102372	0.0248087	AT2G39980	HXXXD-type acyl-transferase family protein
AT5G63820	3.093	1.28579e-06	6.12905e-05	-2.69595	1.5329e-05	6.28955e-05	2.11747	0.00117206	0.0173098	-1.64036	0.0242029	0.05237	AT5G63820	Protein of unknown function (DUF626)
AT1G21830	2.96938	4.51559e-20	1.38961e-17	-2.39244	9.6473e-14	1.24157e-12	2.70485	3.46478e-17	7.88086e-15	-1.77859	5.43104e-07	3.59424e-06	AT1G21820	unknown protein; CONTAINS InterPro DOMAIN/s: Protein of unknown function DUF740 (InterPro:IPR008004); BEST Arabidopsis thaliana protein match is: unknown protein (TAIR:AT1G44608.1); Has 49 Blast hits to 49 proteins in 12 species: Archae - 0; Bacteri /.../ Metazoa - 0; Fungi - 0; Plants - 49; Viruses - 0; Other Eukaryotes - 0 (source: NCBI BLink).
AT3G50350	2.95573	2.19815e-12	2.8749e-10	-2.04662	2.00174e-06	9.63396e-06	2.38376	1.95794e-08	1.30483e-06	-1.41222	0.0205954	0.045531	F11C1_190	Protein of unknown function (DUF1685)
AT4G16770	2.80874	9.09665e-21	3.33959e-18	-2.88778	1.00645e-21	2.63261e-20	3.85076	1.93583e-33	1.76127e-30	-1.69618	5.26841e-07	3.49546e-06	AT4G16770	2-oxoglutarate (2OG) and Fe(II)-dependent oxygenase superfamily protein
AT5G49630	2.76355	2.96096e-10	3.00782e-08	-2.52934	6.98147e-09	4.88283e-08	2.30843	2.22325e-07	1.15158e-05	-1.41887	0.02442	0.0527524	AAP6	amino acid permease 6
AT5G46240	2.72498	1.65571e-22	7.07088e-20	-2.48442	4.62154e-19	9.88859e-18	2.35448	2.7793e-17	6.39116e-15	-1.01244	0.898655	0.932708	KAT1	potassium channel in Arabidopsis thaliana 1
AT5G48900	2.70332	9.45681e-20	2.82705e-17	-3.27177	8.78116e-27	3.11449e-25	2.80322	4.2601e-21	1.46142e-18	-1.95815	3.38559e-10	3.74851e-09	AT5G48900	Pectin lyase-like superfamily protein
AT2G34930	2.51487	3.1631e-08	2.23618e-06	-2.33948	2.94333e-07	1.63029e-06	3.28379	1.74355e-11	1.91024e-09	-1.94145	6.41629e-05	0.000282608	AT2G34930	disease resistance family protein / LRR family protein
AT1G78970	2.45525	2.42511e-07	1.41754e-05	-3.0358	2.7301e-10	2.29623e-09	2.1529	9.32213e-06	0.000311124	-1.60485	0.00566097	0.0149013	LUP1	lupeol synthase 1
AT1G29465	2.42541	4.61104e-07	2.4933e-05	-2.40659	5.76365e-07	3.0511e-06	2.11065	2.07127e-05	0.000630909	-1.56808	0.00802379	0.0201085	AT1G29465	unknown protein; FUNCTIONS IN: molecular_function unknown; INVOLVED IN: biological_process unknown; LOCATED IN: endomembrane system; Has 30201 Blast hits to 17322 proteins in 780 species: Archae - 12; Bacteria - 1396; Metazoa - 17338; Fungi - 3422; /.../ - 5037; Viruses - 0; Other Eukaryotes - 2996 (source: NCBI BLink).
AT2G26440	2.38574	0.00258004	0.0359454	-2.93591	0.000216672	0.000706574	3.31869	4.56043e-05	0.00122663	-1.52462	0.138716	0.226284	PME12	Plant invertase/pectin methylesterase inhibitor superfamily
AT5G60840	2.29475	3.6084e-20	1.16168e-17	-2.44021	9.83114e-23	2.799e-21	2.32558	1.05697e-20	3.56743e-18	-1.63974	1.0427e-08	9.12566e-08	AT5G60840/MAE1_90	unknown protein; Has 361 Blast hits to 333 proteins in 92 species: Archae - 2; Bacteria - 55; Metazoa - 145; Fungi - 36; Plants - 42; Viruses - 19; Other Eukaryotes - 62 (source: NCBI BLink).
AT5G57660	2.29556	7.9857e-19	2.1988e-16	-2.50035	2.09354e-22	5.84126e-21	2.44	2.22782e-21	8.32487e-19	-1.80738	1.8095e-10	2.06577e-09	COL5/BBX6	CONSTANS-like 5
AT5G53980	2.26658	0.000109073	0.00299143	-2.13456	0.000314189	0.000989425	4.93195	1.72698e-12	2.24465e-10	-1.81868	0.0033688	0.00945203	ATHB52	homeobox protein 52
AT4G08950	2.19174	5.44801e-09	4.51651e-07	-2.60327	1.70479e-12	1.89757e-11	2.07518	6.2228e-08	3.66812e-06	-1.83363	5.96704e-06	3.23991e-05	FLA5	FASCICLIN-like arabinogalactan protein 5 precursor
AT5G08130	2.06163	1.19533e-19	3.52304e-17	-2.5049	4.12615e-30	1.74785e-28	2.34531	1.50795e-26	8.0911e-24	-1.80033	8.3463e-14	1.44105e-12	BIM1/AtbHLH46	basic helix-loop-helix (bHLH) DNA-binding superfamily protein
AT2G34300	2.01032	4.96145e-16	9.79465e-14	-2.34929	7.23611e-23	2.07998e-21	2.05562	8.98162e-17	1.97841e-14	-1.84602	8.88076e-13	1.35748e-11	AT2G34300	S-adenosyl-L-methionine-dependent methyltransferases superfamily protein
hfr1_FR/WL_up not UVB/FR_down
	hfr1_FR/WL			hfr1_FR/UVB_FR/WL			Col_FR/WL			Col_FR/UVB_FR/WL
AGI	hfr1_FR/WL_FC	pvalue	pvalue_with_FDR	hfr1_FR/UVB_vs_FR/WL_FC	pvalue	pvalue_with_FDR	Col_FR/WL_FC	pvalue	pvalue_with_FDR	Col_FR/UVB_vs_FR/WL_FC	pvalue	pvalue_with_FDR	Name/AGI	Description
AT2G28056	45.4147	0.00017166	0.00370708	1.28356	0.634171	0.733713	27.2834	3.57036e-10	3.54091e-08	-1.52017	0.511116	0.606636	MIR172A	MIR172/MIR172A; miRNA
AT5G17030	13.9717	1.58237e-09	1.25904e-07	16.2806	4.61747e-36	3.17846e-34	6.00212	0.0875727	0.362953	3.96716	0.000417242	0.00942894	UGT78D3	UDP-glucosyl transferase 78D3
AT2G20825	7.99285	6.65739e-08	3.87254e-06	2.5826	6.36833e-05	0.000280732	5.03136	0.5666	0.8492	5.06315	2.1307e-05	0.000774079	ULT2	Developmental regulator, ULTRAPETALA
AT5G50360	7.59198	0.00248282	0.0315073	-2.1166	0.183963	0.284609	-2.51604	0.0631961	0.304607	2.31389	0.167139	0.248159	AT5G50360	unknown protein; BEST Arabidopsis thaliana protein match is: unknown protein (TAIR:AT3G48510.1); Has 1807 Blast hits to 1807 proteins in 277 species: Archae - 0; Bacteria - 0; Metazoa - 736; Fungi - 347; Plants - 385; Viruses - 0; Other Eukaryotes - /.../source: NCBI BLink).
AT1G65480	7.20707	8.19212e-13	1.10599e-10	2.52272	6.7677e-06	3.6472e-05	5.64329	0.0838953	0.356337	1.68529	0.0151355	0.0317011	FT	PEBP (phosphatidylethanolamine-binding protein) family protein
AT3G62090	6.87597	7.41361e-37	9.69608e-34	-1.11678	0.400891	0.524578	3.99338	0.070907	0.325323	-1.71145	9.18939e-05	0.000322755	PIL2/PIF6/AtbHLH132	phytochrome interacting factor 3-like 2
AT1G02350	6.61392	1.26481e-35	1.39302e-32	1.33931	0.015811	0.0361913	5.70089	7.82956e-06	0.000308553	-1.59267	0.000341648	0.0010642	AT1G02350	protoporphyrinogen oxidase-related
AT5G54470	5.84107	8.69628e-31	6.49923e-28	1.29935	0.0402214	0.0805968	4.18474	1.68125e-12	2.24089e-10	1.79742	8.25364e-06	3.55455e-05	BBX29	B-box type zinc finger family protein
AT1G18400	5.82102	2.55409e-25	1.30358e-22	1.65699	0.000987359	0.00322282	4.80273	2.22514e-12	2.89213e-10	1.24884	0.145961	0.221588	BEE1/AtbHLH44	BR enhanced expression 1
AT1G02400	5.76129	2.01711e-19	5.7822e-17	-1.94245	0.000253647	0.000968228	3.44244	0.024056	0.169994	-1.88094	0.000512373	0.00154184	GA2OX6	gibberellin 2-oxidase 6
AT2G38490	5.19523	1.45279e-05	0.000461323	1.22275	0.442129	0.564455	2.33008	5.16651e-06	0.000213243	1.56939	0.101622	0.163254	CIPK22	CBL-interacting protein kinase 22
AT1G73550	4.90622	0.00335622	0.0396568	-2.18669	0.0999022	0.17283	2.11249	0.495828	0.808538	-5.45192	0.00166746	0.00446206	T9L24.29	Bifunctional inhibitor/lipid-transfer protein/seed storage 2S albumin superfamily protein
AT1G68800	4.76716	0.000338978	0.00632952	-1.03712	0.9105	0.941035	1.95891	0.054026	0.278529	-1.26213	0.638926	0.721952	BRC2/TCP12	TCP domain protein 12
AT1G61800	4.68834	1.72134e-05	0.000534432	6.64841	4.41172e-09	4.08313e-08	2.60049	1.84618e-07	1.1198e-05	7.80083	3.76972e-10	3.11922e-09	GPT2	glucose-6-phosphate/phosphate translocator 2
AT3G62610	4.32508	0.000224417	0.00454818	32.0528	5.92919e-67	1.06046e-64	2.9367	0.543267	0.835597	35.2117	9.9888e-62	1.28237e-59	ATMYB11	myb domain protein 11
AT1G20680	4.14924	0.00325396	0.038777	-1.89355	0.122298	0.204327	1.49581	7.82938e-07	3.9479e-05	-1.11863	0.79261	0.847487	AT1G20680	Protein of unknown function (DUF833)
AT1G14930	4.1431	0.000337827	0.00631757	-1.56253	0.218338	0.32647	4.33152	0.000659448	0.0128848	-2.16051	0.0369671	0.0690383	MLP2	Polyketide cyclase/dehydrase and lipid transport superfamily protein
AT2G01200	4.13681	7.73966e-05	0.00190766	-1.53026	0.18513	0.285948	9.10401	1.80082e-07	1.09866e-05	-1.90281	0.0435836	0.0794935	IAA32	indole-3-acetic acid inducible 32
AT4G30180	4.11258	4.72283e-09	3.52964e-07	-1.50612	0.058995	0.111269	3.56379	7.85125e-09	6.34344e-07	-1.81917	0.00814471	0.0183858	AtbHLH146	sequence-specific DNA binding transcription factors;transcription regulators
AT5G59220	3.81472	0.00151343	0.0212836	-1.76846	0.158994	0.252589	-1.64369	1.63487e-22	7.07088e-20	2.72755	0.01509	0.0316306	HAI1	highly ABA-induced PP2C gene 1
AT3G59900	3.76145	1.23248e-11	1.38668e-09	1.19144	0.301412	0.420546	2.46664	2.82882e-24	1.59989e-21	1.2179	0.254166	0.349174	ARGOS	auxin-regulated gene involved in organ size
AT1G07985	3.72528	3.84682e-05	0.0010648	2.1353	0.00200889	0.00602437	1.41461	6.50527e-16	1.27224e-13	5.33288	6.09251e-11	5.5722e-10	AT1G07985	Expressed protein
AT2G37030	3.72155	0.000417936	0.00749419	2.10806	0.0280615	0.0593686	5.75092	9.92781e-07	4.84264e-05	1.04206	0.902512	0.929336	SAUR46	SAUR-like auxin-responsive protein family
AT2G39350	3.71895	3.35072e-06	0.000129367	-1.50408	0.131316	0.216304	1.43621	1.32071e-09	1.21215e-07	1.97863	0.0119043	0.0256285	ABCG1	ABC-2 type transporter family protein
AT1G04310	3.58616	4.35596e-11	4.42489e-09	-1.29901	0.146389	0.235986	2.75743	0.00955333	0.090295	-1.38362	0.0767647	0.128551	ERS2	ethylene response sensor 2
AT3G29575	3.53742	8.69427e-12	1.00517e-09	-1.34888	0.0906068	0.159411	1.9835	0.143784	0.473467	1.04707	0.794974	0.848855	AFP3	ABI five binding protein 3
AT5G17780	3.46898	3.28546e-22	1.34807e-19	4.79407	1.22004e-51	1.38003e-49	2.1056	4.83606e-05	0.00150819	5.30346	4.42383e-57	4.95043e-55	AT5G17780	alpha/beta-Hydrolases superfamily protein
AT5G15960	3.33965	9.75603e-06	0.000323541	2.63234	0.000217369	0.000844533	1.2188	2.67485e-38	3.7316e-35	5.33587	6.86062e-10	5.49428e-09	KIN1	stress-responsive protein (KIN1) / stress-induced protein (KIN1)
AT5G59240	3.32064	4.71729e-08	2.84478e-06	1.41352	0.057741	0.109318	2.43593	0.00192759	0.028689	1.38031	0.108001	0.450502	RPS8B	Ribosomal protein S8e family protein
AT5G62210	3.26031	9.26786e-10	7.66559e-08	27.3691	1.74572e-59	2.4851e-57	2.48322	0.127134	0.444884	38.7921	1.50206e-68	2.39939e-66	AT5G62210/MMI9_30	Embryo-specific protein 3, (ATS3)
AT5G17220	3.14869	1.24597e-05	0.000404861	33.3662	4.16512e-39	3.25222e-37	1.55659	3.71183e-07	2.0713e-05	62.8901	5.01552e-49	4.39141e-47	ATGSTF12	glutathione S-transferase phi 12
AT4G12470	3.09752	0.00179428	0.0242709	-1.30818	0.446928	0.56902	1.90041	4.38769e-05	0.00139539	-2.0638	0.0420153	0.0770563	AZI1	azelaic acid induced 1
AT5G66590	3.05485	1.58795e-13	2.37354e-11	1.53606	0.00314751	0.00891872	2.90505	0.893613	0.970707	-1.2593	0.114899	0.181298	K1F13.27	CAP (Cysteine-rich secretory proteins, Antigen 5, and Pathogenesis-related 1 protein) superfamily protein
AT5G15970	3.04335	3.27993e-09	2.52338e-07	1.09293	0.627433	0.728454	2.29585	0.0159402	0.12867	1.51642	0.0234177	0.0463305	KIN2	stress-responsive protein (KIN2) / stress-induced protein (KIN2) / cold-responsive protein (COR6.6) / cold-regulated protein (COR6.6)
AT5G57560	2.9804	2.07249e-08	1.37679e-06	2.24567	2.12587e-05	0.0001042	3.96637	0.00302006	0.0401511	1.67988	0.00597747	0.013965	XTH22/TCH4	Xyloglucan endotransglucosylase/hydrolase family protein
AT1G69490	2.89676	0.00028948	0.00556771	1.00721	0.978964	0.986317	1.95644	5.81621e-06	0.000237715	1.62573	0.0824313	0.136501	NAP	NAC-like, activated by AP3/PI
AT4G27310	2.84472	1.52976e-14	2.62392e-12	1.0826	0.542513	0.655199	2.2629	0	0.0002	2.48765	2.27021e-11	3.25433e-09	BBX28	B-box type zinc finger family protein
AT2G35658	2.8129	0.00234879	0.0301169	1.08954	0.743231	0.819996	1.18632	3.82591e-05	0.00123171	-1.08138	0.751378	0.814258	AT2G35658	unknown protein; FUNCTIONS IN: molecular_function unknown; INVOLVED IN: biological_process unknown; LOCATED IN: cellular_component unknown; BEST Arabidopsis thaliana protein match is: unknown protein (TAIR:AT4G16840.1); Has 30201 Blast hits to 17322 /.../ins in 780 species: Archae - 12; Bacteria - 1396; Metazoa - 17338; Fungi - 3422; Plants - 5037; Viruses - 0; Other Eukaryotes - 2996 (source: NC…
AT2G45900	2.75289	0.00105229	0.0159335	-1.90687	0.0327352	0.0674362	1.79851	0.066248	0.312795	-2.51783	0.00288901	0.00731905	AT2G45900	Phosphatidylinositol N-acetyglucosaminlytransferase subunit P-related
AT1G21910	2.72628	1.17922e-08	8.28064e-07	-1.45774	0.0250468	0.0539282	2.46133	0.000324898	0.00731055	-1.48344	0.0190708	0.0387866	DREB26	Integrase-type DNA-binding superfamily protein
AT2G31940	2.69573	0.00128937	0.018724	-1.02625	0.917829	0.945354	-1.2108	0.000100279	0.00278308	1.88793	0.029292	0.0563957	AT2G31940	unknown protein; INVOLVED IN: biological_process unknown; LOCATED IN: endomembrane system; EXPRESSED IN: 16 plant structures; EXPRESSED DURING: 6 growth stages; BEST Arabidopsis thaliana protein match is: unknown protein (TAIR:AT5G19875.1); Has 227 /.../hits to 227 proteins in 13 species: Archae - 0; Bacteria - 0; Metazoa - 0; Fungi - 0; Plants - 227; Viruses - 0; Other Eukaryotes - 0 (source: NC…
AT1G11210	2.68335	4.32084e-10	3.73628e-08	-1.04889	0.74319	0.819994	2.21354	1.27986e-09	1.18506e-07	1.12645	0.409313	0.510568	T28P6.13	Protein of unknown function (DUF761)
AT3G22840	2.64262	1.97081e-09	1.54461e-07	176.762	2.65531e-152	3.96894e-149	2.1813	0.0170736	0.134722	186.668	2.02911e-154	2.65382e-151	ELIP1	Chlorophyll A-B binding family protein
AT5G02190	2.6394	3.38025e-06	0.000130236	-1.69914	0.0071876	0.0182822	1.98683	0.017056	0.134634	-2.91054	3.36252e-07	1.84974e-06	EMB24	Eukaryotic aspartyl protease family protein
AT5G01790	2.63122	7.14716e-10	5.95863e-08	-1.13067	0.41726	0.54079	2.47216	0.00810287	0.0808201	2.24882	2.12228e-07	1.41436e-05	T20L15_60	unknown protein; FUNCTIONS IN: molecular_function unknown; INVOLVED IN: biological_process unknown; LOCATED IN: chloroplast; EXPRESSED IN: 19 plant structures; EXPRESSED DURING: 13 growth stages; Has 121 Blast hits to 121 proteins in 12 species: Arc /.../0; Bacteria - 0; Metazoa - 0; Fungi - 0; Plants - 121; Viruses - 0; Other Eukaryotes - 0 (source: NCBI BLink).
AT5G25460	2.61708	1.62002e-24	7.53343e-22	-1.03035	0.745912	0.822	2.60267	0.000636912	0.0125499	2.08914	3.1418e-15	7.14623e-13	AT5G25460	Protein of unknown function, DUF642
AT5G59010	2.61546	7.90551e-19	2.17672e-16	1.2598	0.0228526	0.0498398	2.8618	0.275922	0.637519	2.76919	8.66314e-22	4.53212e-19	AT5G59010	Protein kinase protein with tetratricopeptide repeat domain
AT1G06000	2.61136	9.14391e-19	2.48501e-16	8.7891	1.4219e-81	3.96728e-79	2.39677	0.093736	0.377288	2.47762	3.55392e-17	1.06242e-14	UGT89C1	UDP-Glycosyltransferase superfamily protein
AT5G24580	2.60044	1.5145e-08	1.03233e-06	-1.78572	0.000337198	0.00124536	2.31953	5.00517e-07	2.6651e-05	2.06486	9.77515e-06	0.000411579	AT5G24580	Heavy metal transport/detoxification superfamily protein
AT3G19970	2.59595	1.36921e-12	1.80202e-10	-1.2653	0.0653742	0.121192	2.24967	2.12505e-08	1.56031e-06	1.89579	1.29982e-06	7.13912e-05	AT3G19970	alpha/beta-Hydrolases superfamily protein
AT1G02470	2.58274	0.00348788	0.0408435	-1.66752	0.0910193	0.160056	1.6613	2.98303e-10	3.0156e-08	2.39997	0.00730964	0.0881459	AT1G02470	Polyketide cyclase/dehydrase and lipid transport superfamily protein
AT5G10100	2.57769	0.000259629	0.00511582	1.35857	0.195683	0.298895	1.94502	5.8798e-05	0.00179099	3.13567	7.07112e-06	0.000312833	TPPI	Haloacid dehalogenase-like hydrolase (HAD) superfamily protein
AT2G18790	2.57008	1.48102e-43	2.58266e-40	1.28571	0.00013237	0.000541011	2.40784	0.00641848	0.0680755	2.4942	1.72588e-41	3.74199e-38	PHYB	phytochrome B
AT1G44830	2.55977	0.00224419	0.0289531	-1.39259	0.223861	0.333251	1.75543	0	0.0015	3.60448	0.000121238	0.0033737	ERF014	Integrase-type DNA-binding superfamily protein
AT5G62220	2.54265	7.55591e-22	2.9833e-19	-1.09999	0.310288	0.430907	3.0713	0.0112256	0.101418	2.46762	6.45969e-21	2.76297e-18	ATGT18	glycosyltransferase 18
AT2G36270	2.49429	7.25365e-05	0.00180487	-1.92801	0.00236059	0.00693495	1.50254	1.26567e-06	6.06073e-05	1.81154	0.00349509	0.0512172	ABI5	Basic-leucine zipper (bZIP) transcription factor family protein
AT1G35140	2.47979	8.51663e-05	0.00206511	2.70691	6.32902e-06	3.42491e-05	3.16926	0.00106915	0.0186597	2.52406	4.5649e-05	0.00147872	EXL1/PHI-1	Phosphate-responsive 1 family protein
AT1G64220	2.47505	5.43346e-05	0.00142661	1.33874	0.114505	0.193752	1.96516	0.000330475	0.00739476	1.99827	0.000623956	0.0129276	TOM7-2	translocase of outer membrane 7 kDa subunit 2
AT2G28040	2.45828	0.00436307	0.0484278	-1.14711	0.628296	0.729092	2.26439	0.219032	0.577699	1.89796	0.0671356	0.35263	AT2G28040	Eukaryotic aspartyl protease family protein
AT4G11050	2.41101	0.00344763	0.040531	-1.89483	0.0249547	0.0537608	1.0406	9.08769e-14	1.44067e-11	1.78312	0.0338266	0.238428	AtGH9C3	glycosyl hydrolase 9C3
AT3G08570	2.40827	5.21478e-07	2.49143e-05	-1.43375	0.0245358	0.0529752	1.68818	3.00444e-07	1.72249e-05	1.58099	0.00635148	0.0796829	AT3G08570	Phototropic-responsive NPH3 family protein
AT1G36940	2.39102	4.99596e-07	2.39234e-05	-1.52846	0.00985224	0.0240076	2.18078	1.14819e-06	5.54895e-05	2.07763	1.18737e-05	0.000478746	F1O3.8	unknown protein; Has 21 Blast hits to 21 proteins in 8 species: Archae - 0; Bacteria - 0; Metazoa - 0; Fungi - 0; Plants - 21; Viruses - 0; Other Eukaryotes - 0 (source: NCBI BLink).
AT3G51660	2.36185	0.00391948	0.0447458	-1.4704	0.186167	0.287275	1.87156	1.74707e-30	1.35405e-27	-1.66774	0.0804061	0.133708	AT3G51660/T18N14_40	Tautomerase/MIF superfamily protein
AT3G19270	2.35622	0.00204254	0.0267505	1.84312	0.00683502	0.0175238	2.28175	0.633777	0.880409	3.0924	0.000138416	0.00376168	CYP707A4	cytochrome P450, family 707, subfamily A, polypeptide 4
AT4G21500	2.32918	0.000147866	0.00326741	-1.28087	0.218792	0.327008	2.28671	0.0249292	0.173831	2.38138	6.49256e-05	0.00200388	F18E5.120	unknown protein; FUNCTIONS IN: molecular_function unknown; INVOLVED IN: biological_process unknown; LOCATED IN: endomembrane system; BEST Arabidopsis thaliana protein match is: unknown protein (TAIR:AT4G05018.1); Has 20 Blast hits to 20 proteins in /.../ies: Archae - 0; Bacteria - 0; Metazoa - 0; Fungi - 0; Plants - 17; Viruses - 0; Other Eukaryotes - 3 (source: NCBI BLink).
AT2G43140	2.32569	0.00249252	0.031573	1.34889	0.258333	0.373463	1.62446	0.00951457	0.0900506	-1.11184	0.697859	0.915628	BHLH129/AtbHLH129	basic helix-loop-helix (bHLH) DNA-binding superfamily protein
AT5G48880	2.2958	1.12836e-11	1.29027e-09	10.7937	2.16288e-75	4.97367e-73	2.10113	1.35077e-09	1.23433e-07	2.4051	6.09405e-13	1.0627e-10	PKT1	peroxisomal 3-keto-acyl-CoA thiolase 2
AT4G11521	2.29442	0.00179155	0.0242509	1.20745	0.445187	0.567287	1.58061	0.452998	0.780284	1.19991	0.461719	0.560827	CRK34	Receptor-like protein kinase-related family protein
AT2G22590	2.288	0.00346615	0.0406573	159.785	9.31807e-210	6.49966e-206	2.41842	9.90966e-05	0.00275391	3.50847	1.66057e-06	8.68725e-05	UGT91A1	UDP-Glycosyltransferase superfamily protein
AT2G44570	2.2851	0.000585269	0.00988486	-1.73082	0.0149762	0.034545	1.79917	0.029713	0.195219	-1.07683	0.74322	0.932653	AtGH9B12	glycosyl hydrolase 9B12
AT3G08660	2.27505	2.38217e-05	0.000710777	-1.05225	0.767724	0.839318	1.56155	6.17465e-09	5.08704e-07	1.70597	0.00351542	0.0514071	AT3G08660	Phototropic-responsive NPH3 family protein
AT4G14690	2.26853	3.25153e-05	0.000926996	437.001	3.00656e-134	3.14576e-131	1.2325	0.922544	0.97931	2.68783	2.7062e-07	1.75869e-05	ELIP2	Chlorophyll A-B binding family protein
AT2G23910	2.26365	2.09701e-07	1.09159e-05	22.6458	2.97515e-74	6.6232e-72	1.70886	0.0294151	0.193993	2.12055	1.12595e-06	6.29988e-05	AT2G23910	NAD(P)-binding Rossmann-fold superfamily protein
AT3G30180	2.24911	2.34754e-13	3.43528e-11	-1.1626	0.160603	0.254759	1.74314	3.62772e-05	0.00117641	2.13935	5.76891e-12	8.94224e-10	CYP85A2	brassinosteroid-6-oxidase 2
AT2G29090	2.24497	2.19243e-05	0.000662033	17.3536	1.4537e-81	4.00264e-79	1.3736	0.0547372	0.280057	1.84696	0.000675985	0.0137203	CYP707A2	cytochrome P450, family 707, subfamily A, polypeptide 2
AT5G52570	2.22642	1.59578e-15	3.00841e-13	-1.17727	0.094587	0.165137	1.88059	0.000390657	0.00848899	2.0988	1.90613e-13	3.49892e-11	BETA-OHASE 2	beta-carotene hydroxylase 2
AT1G24530	2.21866	4.63097e-09	3.47339e-07	-1.00401	0.975533	0.984295	1.7314	1.15124e-10	1.24179e-08	1.6075	0.000437901	0.00982157	AT1G24530	Transducin/WD40 repeat-like superfamily protein
AT5G65300	2.21561	0.000211021	0.00433558	-1.81873	0.00350686	0.00978331	2.35399	3.40976e-05	0.00112013	2.43463	1.40351e-05	0.000546474	AT5G65300	unknown protein; Has 30201 Blast hits to 17322 proteins in 780 species: Archae - 12; Bacteria - 1396; Metazoa - 17338; Fungi - 3422; Plants - 5037; Viruses - 0; Other Eukaryotes - 2996 (source: NCBI BLink).
AT5G49330	2.21252	1.1921e-07	6.47945e-06	8.69635	3.10926e-47	3.15847e-45	2.32922	6.60313e-19	1.84236e-16	2.02432	1.73231e-06	8.99511e-05	MYB111	myb domain protein 111
AT1G01470	2.21119	7.09911e-08	4.08121e-06	-1.58982	0.00142863	0.00445415	1.44521	0.00655963	0.0692218	2.31894	9.81369e-09	8.92875e-07	LEA14	Late embryogenesis abundant protein
AT1G73830	2.20915	0.00133	0.0192208	-1.18999	0.469234	0.589225	1.94533	0.0656191	0.311063	1.19751	0.464869	0.810924	BEE3/AtbHLH50	BR enhanced expression 3
AT3G44310	2.18646	3.79168e-11	3.92795e-09	1.3259	0.015896	0.0363461	2.14279	0.00123288	0.0207556	2.0246	2.28441e-09	2.28725e-07	NIT1	nitrilase 1
AT2G46790	2.1833	2.53935e-08	1.63503e-06	2.16729	3.0363e-09	2.88807e-08	1.98467	4.80055e-06	0.000200512	1.86979	1.16e-05	0.000471116	APRR9	pseudo-response regulator 9
AT4G03140	2.18247	2.20361e-05	0.00066445	-1.57554	0.00918258	0.0225692	1.78857	7.22167e-07	3.6591e-05	2.02085	9.7055e-05	0.00280909	F4C21.6	NAD(P)-binding Rossmann-fold superfamily protein
AT2G45210	2.18062	0.00134088	0.0193634	-1.60774	0.0407859	0.0814705	1.34508	0.0808803	0.350559	1.36074	0.190452	0.584834	SAUR36/SAG201	SAUR-like auxin-responsive protein family
AT2G45310	2.15975	7.70064e-09	5.59526e-07	-1.32369	0.0288384	0.060742	1.97839	3.22673e-17	7.33941e-15	1.85213	2.05732e-06	0.000104241	GAE4	UDP-D-glucuronate 4-epimerase 4
AT1G01260	2.15232	3.44124e-21	1.20019e-18	-1.40471	1.08341e-05	5.6173e-05	1.83739	7.6713e-13	1.06311e-10	1.76343	1.84146e-12	3.05829e-10	BHLH13/MYC7E/AtbHLH13	basic helix-loop-helix (bHLH) DNA-binding superfamily protein
AT1G15760	2.1477	0.00153417	0.0214434	1.52682	0.0297432	0.0623279	1.14682	0.032773	0.206818	1.76763	0.00767924	0.0174688	F7H2.10	Sterile alpha motif (SAM) domain-containing protein
AT3G21310	2.14016	0.00327719	0.0389429	-1.43505	0.129178	0.213601	1.1337	0.6338	0.8804	1.99723	0.00545307	0.0714533	AT3G21310	Core-2/I-branching beta-1,6-N-acetylglucosaminyltransferase family protein
AT2G42610	2.13077	9.10859e-06	0.000305135	-1.57213	0.00581128	0.0152351	1.54943	0.0095	0.0901	2.06305	1.44739e-05	0.000560892	LSH10	Protein of unknown function (DUF640)
AT5G51810	2.12618	0.000574429	0.0097569	-1.76714	0.00786357	0.0197495	1.96277	0.0019	0.0287	3.04183	3.53677e-07	2.23596e-05	GA20OX2	gibberellin 20 oxidase 2
AT2G44080	2.10524	0.000422866	0.00756317	-1.46914	0.0589309	0.111177	1.41412	0.0876	0.363	1.19462	0.397307	0.771891	ARL	ARGOS-like
AT2G28050	2.10038	1.0069e-05	0.000333393	1.11206	0.485108	0.604602	2.24409	0.00985427	0.0923469	-1.07347	0.662905	0.742802	AT2G28050	Pentatricopeptide repeat (PPR) superfamily protein
AT5G39610	2.09676	0.00447322	0.0493186	-1.97322	0.00834165	0.0207831	1.77521	0.0249	0.1738	1.06428	0.809436	0.953886	ATNAC2	NAC domain containing protein 6
AT3G05880	2.08779	1.63353e-08	1.10985e-06	-1.5514	0.000677832	0.0023094	2.13499	0	0	2.07126	2.21108e-08	1.85819e-06	RCI2A	Low temperature and salt responsive protein family
AT4G16750	2.08595	0.000110173	0.00254748	-1.20122	0.31276	0.433517	1.52866	0.0297	0.1952	1.83257	0.0011613	0.021392	ERF039	Integrase-type DNA-binding superfamily protein
AT4G27280	2.07644	2.23533e-05	0.000671112	-1.19819	0.275636	0.392344	1.93599	0.0001	0.0028	1.43761	0.0309869	0.226566	AT4G27280	Calcium-binding EF-hand family protein
AT5G09440	2.07085	5.88567e-08	3.48905e-06	-1.71775	4.62521e-05	0.000210453	1.7309	0	0.0012	1.45776	0.00459033	0.0630297	EXL4	EXORDIUM like 4
AT1G50110	2.0651	2.22657e-05	0.000669444	-1.42699	0.0285998	0.0603212	-1.01688	0.9225	0.9793	1.45534	0.0207684	0.177823	BCAT6	D-aminoacid aminotransferase-like PLP-dependent enzymes superfamily protein
AT1G07150	2.06452	5.40944e-06	0.000195844	4.27566	1.20546e-24	5.00504e-23	1.40161	0.0294	0.194	2.24385	1.23091e-07	8.76122e-06	MAPKKK13	mitogen-activated protein kinase kinase kinase 13
AT4G24960	2.0575	0.000162126	0.003523	-1.10897	0.580571	0.688877	1.44057	0.0547	0.2801	2.44472	2.68701e-06	0.000131991	ATHVA22D	HVA22 homologue D
AT3G28340	2.05385	4.25318e-05	0.00115737	-1.69318	0.00197466	0.00594045	2.06502	0	0.0011	1.50541	0.0176681	0.160189	GATL10	galacturonosyltransferase-like 10
AT4G27720	2.05338	1.27996e-17	3.11447e-15	-1.38949	6.57466e-05	0.000289036	2.10996	0	0	1.90286	1.29459e-14	2.82194e-12	T29A15.210	Major facilitator superfamily protein
AT5G17460	2.0445	0.000575578	0.00976848	-1.0926	0.664019	0.757752	1.75466	0.0066	0.0692	2.66821	2.42855e-06	0.000120712	AT5G17460	unknown protein; FUNCTIONS IN: molecular_function unknown; INVOLVED IN: response to salt stress; LOCATED IN: mitochondrion; Has 30201 Blast hits to 17322 proteins in 780 species: Archae - 12; Bacteria - 1396; Metazoa - 17338; Fungi - 3422; Plants - /.../Viruses - 0; Other Eukaryotes - 2996 (source: NCBI BLink).
AT1G20900	2.04408	1.73022e-09	1.37147e-07	-1.28008	0.0284623	0.0600951	1.497	0.0004	0.0085	1.93313	2.04497e-08	1.73955e-06	ESC	Predicted AT-hook DNA-binding family protein
AT3G51240	2.0417	2.19865e-08	1.44229e-06	25.5011	6.0038e-111	3.3062e-108	1.57589	0.0003	0.0074	2.34691	2.27054e-11	3.25433e-09	F3H	flavanone 3-hydroxylase
AT5G17040	2.04011	2.67342e-06	0.000106941	7.85601	8.27071e-74	1.74821e-71	1.31053	0.0656	0.3111	1.60055	0.0014701	0.0258516	UGT78D4	UDP-Glycosyltransferase superfamily protein
AT5G54585	2.02791	0.000234365	0.00469314	1.3273	0.128794	0.213139	2.41732	0	0.0002	3.30155	8.88137e-10	9.73045e-08	AT5G54585	unknown protein; Has 30201 Blast hits to 17322 proteins in 780 species: Archae - 12; Bacteria - 1396; Metazoa - 17338; Fungi - 3422; Plants - 5037; Viruses - 0; Other Eukaryotes - 2996 (source: NCBI BLink).
AT5G05270	2.01519	4.1369e-08	2.51678e-06	11.7068	2.38415e-71	4.7515e-69	1.88049	0	0	2.21115	5.15373e-10	5.86125e-08	AT5G05270	Chalcone-flavanone isomerase family protein
AT2G47270	2.01177	7.25558e-06	0.000250959	1.46527	0.00487629	0.0130722	1.6339	0.0012	0.0208	1.22836	0.168728	0.552964	UPB1/AtbHLH151	sequence-specific DNA binding transcription factors;transcription regulators
AT3G23050	2.00049	8.33103e-11	8.07107e-09	-1.24997	0.0346573	0.070838	2.47727	0	0	1.76678	8.95182e-08	6.59598e-06	IAA7/AXR2	indole-3-acetic acid 7
Col_FR/WL_up_UVB/FR_down_UVR8_dependently: 197 genes
	Col_FR/WL			Col_FR/UVB_FR/WL			hfr1_FR/WL			hfr1_FR/UVB_FR/WL
AGI	Col_FR/WL_FC	pvalue	pvalue_with_FDR	Col_FR/UVB_vs_FR/WL_FC	pvalue	pvalue_with_FDR	hfr1_FR/WL_FC	pvalue	pvalue_with_FDR	hfr1_FR/UVB_vs_FR/WL_FC	pvalue	pvalue_with_FDR	Name/AGI	Description
AT4G16740	216.384	1.51167e-12	2.02777e-10	-11.9412	1.9223e-07	1.09727e-06	315.278	3.67964e-14	6.063e-12	-2.76891	0.00612522	0.0159523	ATTPS03	terpene synthase 03
AT3G21320	75.042	1.31066e-47	3.91812e-44	-9.56519	1.00284e-24	3.22356e-23	56.4965	1.66826e-42	2.68538e-39	-2.19777	3.39029e-05	0.000159106	AT3G21320	BEST Arabidopsis thaliana protein match is: hydroxyproline-rich glycoprotein family protein (TAIR:AT2G25930.1); Has 63 Blast hits to 58 proteins in 21 species: Archae - 0; Bacteria - 0; Metazoa - 3; Fungi - 0; Plants - 58; Viruses - 0; Other Eukaryo /.../2 (source: NCBI BLink).
AT4G21970	61.4485	1.7136e-05	0.000611926	-61.4485	1.7214e-05	7e-05	3.05388	0.0548038	0.278694	-3.25543	0.040623	0.0811994	AT4G21970	Protein of unknown function, DUF584
AT4G10240	56.085	2.3303e-13	3.50819e-11	-56.1138	2.33877e-13	2.8772e-12	54.1816	7.10766e-13	9.72123e-11	-4.81278	8.3252e-06	4.42053e-05	BBX23	B-box zinc finger family protein
AT2G21910	51.4714	9.83928e-30	7.09989e-27	-13.2735	4.32952e-18	8.37334e-17	55.6268	9.25673e-31	6.67953e-28	-3.16088	1.18387e-05	6.10789e-05	CYP96A5	cytochrome P450, family 96, subfamily A, polypeptide 5
AT5G16023	28.9277	3.52927e-24	1.94351e-21	-25.6254	1.62843e-23	4.83354e-22	23.2009	7.66421e-27	4.33463e-24	-4.38116	1.06915e-10	1.26258e-09	RTFL18	ROTUNDIFOLIA like 18
AT1G62410	22.4413	3.27614e-18	8.46377e-16	-6.06336	3.21103e-10	2.67705e-09	23.9823	7.45962e-16	1.45888e-13	-2.6845	0.000188183	0.000741605	AT1G62410	MIF4G domain-containing protein
AT3G21330	20.2408	7.26181e-107	5.06535e-103	-17.9419	2.67301e-101	9.81324e-99	18.7255	7.10199e-104	4.95388e-100	-4.20465	4.81355e-35	3.15763e-33	BHLH87/AtbHLH87	basic helix-loop-helix (bHLH) DNA-binding superfamily protein
AT1G75450	20.1289	1.5466e-46	4.04552e-43	-6.90441	1.1091e-24	3.54877e-23	26.2093	2.09674e-52	5.48455e-49	-2.62007	3.44697e-08	2.77215e-07	CKX5	cytokinin oxidase 5
AT4G37770	19.8285	5.59155e-41	9.00068e-38	-49.5424	8.19379e-57	9.07213e-55	24.3077	7.99207e-46	1.52038e-42	-17.0674	2.33321e-39	1.84244e-37	ACS8	1-amino-cyclopropane-1-carboxylate synthase 8
AT5G02540	19.7541	1.42014e-44	2.97178e-41	-20.9774	6.36311e-46	5.04373e-44	17.7945	2.78115e-42	4.15702e-39	-5.53976	1.78275e-18	4.80125e-17	T22P11_130	NAD(P)-binding Rossmann-fold superfamily protein
AT1G06080	18.2682	1.81372e-31	1.58141e-28	-23.1659	2.80572e-35	1.54914e-33	16.9972	2.61709e-30	1.71141e-27	-7.20684	2.10693e-17	5.14464e-16	ADS1	delta 9 desaturase 1
AT2G23170	15.0533	9.30498e-20	2.82197e-17	-11.2887	1.06195e-16	1.80817e-15	21.4396	1.50062e-23	6.8265e-21	-7.2966	2.42733e-12	3.52005e-11	GH3.3	Auxin-responsive GH3 family protein
AT1G52830	13.6192	6.75694e-17	1.47287e-14	-6.74029	3.90897e-11	3.64361e-10	4.36865	1.38054e-07	7.3697e-06	-5.05083	8.52973e-09	7.57932e-08	IAA6/SHY1	indole-3-acetic acid 6
AT1G67265	13.0115	1.05709e-11	1.26705e-09	-28.407	1.49073e-14	2.08383e-13	8.53372	7.10758e-12	8.3558e-10	-55.6412	1.95961e-22	7.11923e-21	DVL3	ROTUNDIFOLIA like 21
AT4G13790	11.8052	0.00090582	0.0163689	-6.84295	0.00409804	0.0100135	8.57164	0.000296152	0.00565962	-9.39395	0.000131419	0.000537651	SAUR25	SAUR-like auxin-responsive protein family
AT3G15540	11.5641	1.95718e-41	3.413e-38	-6.9071	1.32596e-28	5.12886e-27	7.50479	2.16093e-30	1.4587e-27	-3.20149	2.02679e-12	2.96385e-11	IAA19/MSG2	indole-3-acetic acid inducible 19
AT2G18010	11.0214	1.33128e-22	5.92733e-20	-10.3096	9.81532e-22	2.57388e-20	9.11713	1.6312e-19	4.7409e-17	-4.01221	1.64747e-10	1.89735e-09	SAUR10	SAUR-like auxin-responsive protein family
AT4G32280	10.8505	1.57656e-41	2.9992e-38	-17.8288	6.22743e-55	6.26516e-53	6.80436	1.02336e-29	6.48932e-27	-3.80471	2.41222e-16	5.43359e-15	IAA29	indole-3-acetic acid inducible 29
AT1G29490	10.8258	2.55675e-18	6.68782e-16	-8.4382	4.26099e-16	6.83261e-15	6.13648	1.68986e-11	1.86116e-09	-2.01415	0.00174598	0.00532523	SAUR68	SAUR-like auxin-responsive protein family
AT1G31880	10.0586	9.35781e-36	1.0879e-32	-6.4165	4.97872e-26	1.71075e-24	6.90255	3.21358e-26	1.68119e-23	-2.3731	1.19212e-07	8.79006e-07	NLM9	DZC (Disease resistance/zinc finger/chromosome condensation-like region) domain containing protein
AT2G47780	9.26454	4.17323e-13	6.02269e-11	-27.1954	2.13113e-22	5.93823e-21	27.2749	5.79084e-23	2.47304e-20	-17.7542	2.70074e-19	7.84942e-18	AT2G47780	Rubber elongation factor protein (REF)
AT5G02244	8.6613	0.00269758	0.0370221	-6.15692	0.00743447	0.0169803	2.46087	0.11584	0.426226	-2.15662	0.16428	0.259344	AT5G02244	Pseudogene of AT3G57870; AHUS5 (SUMO CONJUGATION ENZYME 1); ubiquitin-protein ligase
AT3G23635	8.51508	2.88526e-09	2.52623e-07	-8.50986	2.94102e-09	2.15565e-08	3.39969	9.73624e-05	0.00231874	-8.21798	4.71064e-09	4.34251e-08	RTFL13	ROTUNDIFOLIA like 13
AT5G22500	8.41844	3.66693e-13	5.44214e-11	-20.3183	4.2347e-22	1.14638e-20	11.9054	1.5658e-16	3.27659e-14	-7.17561	1.11458e-11	1.49895e-10	FAR1	fatty acid reductase 1
AT3G60650	8.12454	3.09108e-12	3.94414e-10	-8.17759	3.12519e-12	3.35545e-11	7.17369	4.44547e-11	4.49401e-09	-3.02298	4.34665e-05	0.000199176	T4C21_60	unknown protein; Has 10 Blast hits to 10 proteins in 5 species: Archae - 0; Bacteria - 0; Metazoa - 0; Fungi - 0; Plants - 10; Viruses - 0; Other Eukaryotes - 0 (source: NCBI BLink).
AT4G14130	8.12249	6.22742e-30	4.6541e-27	-23.0288	7.37642e-56	7.83548e-54	18.2584	1.8917e-50	3.95857e-47	-11.9883	1.06996e-39	8.54581e-38	XTH15/XTR7	xyloglucan endotransglucosylase/hydrolase 15
AT4G28720	8.02767	2.17804e-36	2.68104e-33	-5.33849	7.62662e-26	2.58662e-24	7.14748	2.66191e-33	2.32096e-30	-2.75846	1.8639e-11	2.43205e-10	YUC8	Flavin-binding monooxygenase family protein
AT3G51410	7.36221	4.72281e-10	4.59672e-08	-18.3588	1.64678e-14	2.28968e-13	3.95427	2.37288e-06	9.58587e-05	-5.3993	1.44481e-08	1.23455e-07	F26O13.50	Arabidopsis protein of unknown function (DUF241)
AT5G44260	7.13523	1.14779e-15	2.18352e-13	-33.6426	2.8239e-35	1.55508e-33	8.34796	9.14714e-18	2.30618e-15	-9.9494	3.5199e-20	1.08639e-18	AT5G44260	Zinc finger C-x8-C-x5-C-x3-H type family protein
AT5G50335	7.12063	4.12381e-13	5.99269e-11	-14.5373	2.98455e-20	7.10521e-19	8.19073	4.27161e-14	6.95278e-12	-5.2951	3.57914e-10	3.95444e-09	AT5G50335/MXI22.20	unknown protein; Has 30201 Blast hits to 17322 proteins in 780 species: Archae - 12; Bacteria - 1396; Metazoa - 17338; Fungi - 3422; Plants - 5037; Viruses - 0; Other Eukaryotes - 2996 (source: NCBI BLink).
AT5G57760	6.98187	4.48975e-09	3.7884e-07	-3.77272	3.1909e-05	0.000123015	10.0485	1.21939e-11	1.38668e-09	-2.61182	0.00219438	0.00651343	AT5G57760	unknown protein; Has 5 Blast hits to 5 proteins in 2 species: Archae - 0; Bacteria - 0; Metazoa - 0; Fungi - 0; Plants - 5; Viruses - 0; Other Eukaryotes - 0 (source: NCBI BLink).
AT5G25190	6.96954	5.85224e-31	4.89856e-28	-19.4404	2.09238e-57	2.39263e-55	7.69388	3.58397e-33	2.99992e-30	-7.95773	1.73926e-34	1.1029e-32	ERF003	Integrase-type DNA-binding superfamily protein
AT1G09350	6.89153	5.57631e-10	5.35274e-08	-5.52635	2.30895e-08	1.5085e-07	10.5701	3.59383e-13	5.11596e-11	-8.29591	1.8642e-11	2.43205e-10	AtGolS3	galactinol synthase 3
AT1G10550	6.80193	6.03582e-23	2.87058e-20	-6.45437	5.67507e-22	1.52447e-20	6.58996	8.84728e-22	3.42848e-19	-4.09835	4.92827e-14	8.7919e-13	XTH33	xyloglucan:xyloglucosyl transferase 33
AT5G02760	6.80185	1.84401e-20	6.22384e-18	-9.23243	5.82541e-26	1.99513e-24	5.03425	1.79897e-15	3.36118e-13	-3.86949	1.40938e-11	1.86662e-10	APD7	Protein phosphatase 2C family protein
AT4G36110	6.60435	1.09527e-15	2.10272e-13	-4.38889	5.46968e-11	5.02452e-10	8.3206	2.13793e-17	4.97092e-15	-2.19566	0.000244902	0.000938097	SAUR9	SAUR-like auxin-responsive protein family
AT5G63650	6.48049	1.75419e-35	1.83541e-32	-21.5589	1.25054e-72	2.25593e-70	7.36065	1.13877e-39	1.58866e-36	-9.12858	3.58389e-47	3.6056e-45	SNRK2-5	SNF1-related protein kinase 2.5
AT3G29370	6.32163	4.37394e-12	5.5138e-10	-21.4524	1.57336e-21	4.06471e-20	4.66421	1.53078e-09	1.22733e-07	-9.58455	2.65566e-16	5.94993e-15	P1R3/MUO10_8	unknown protein; BEST Arabidopsis thaliana protein match is: unknown protein (TAIR:AT5G39240.1); Has 16 Blast hits to 16 proteins in 5 species: Archae - 0; Bacteria - 0; Metazoa - 0; Fungi - 0; Plants - 16; Viruses - 0; Other Eukaryotes - 0 (source: /.../BLink).
AT1G04180	6.12828	5.77614e-13	8.167e-11	-6.80674	4.84168e-14	6.44101e-13	7.71785	2.559e-16	5.24997e-14	-2.78861	4.54871e-06	2.52685e-05	YUC9	YUCCA 9
AT5G04380	5.94312	0.00137269	0.0222846	-11.0472	9.5775e-05	0.000335337	8.03312	4.13045e-05	0.00112985	-15.9919	3.7073e-07	2.52948e-06	AT5G04380	S-adenosyl-L-methionine-dependent methyltransferases superfamily protein
AT5G62280	5.83073	3.60554e-14	6.08464e-12	-7.7854	5.05301e-18	9.66538e-17	4.02859	1.00579e-09	8.28632e-08	-3.42524	5.10759e-08	3.99557e-07	AT5G62280	Protein of unknown function (DUF1442)
AT2G42870	5.65503	3.79884e-15	6.73682e-13	-19.6231	1.61338e-30	6.94683e-29	6.59385	2.55497e-18	6.68316e-16	-5.22105	2.52866e-15	5.1725e-14	PAR1/HLH1	phy rapidly regulated 1
AT5G18010	5.64313	1.80376e-17	4.33856e-15	-6.26298	5.35922e-19	1.13051e-17	3.72897	2.01649e-11	2.18637e-09	-2.06256	8.62835e-05	0.000368183	SAUR19	SAUR-like auxin-responsive protein family
AT5G52900	5.37754	8.0079e-40	1.19695e-36	-5.02261	4.11083e-37	2.4508e-35	4.23406	1.76926e-30	1.23412e-27	-2.39114	6.17942e-13	9.65724e-12	MAKR6	unknown protein; Has 30201 Blast hits to 17322 proteins in 780 species: Archae - 12; Bacteria - 1396; Metazoa - 17338; Fungi - 3422; Plants - 5037; Viruses - 0; Other Eukaryotes - 2996 (source: NCBI BLink).
AT1G80130	5.33054	8.95183e-14	1.42997e-11	-2.64078	5.13313e-06	2.29276e-05	8.74035	1.36767e-21	5.2036e-19	-2.70801	1.60982e-06	9.74742e-06	F18B13.21	Tetratricopeptide repeat (TPR)-like superfamily protein
AT5G02580	5.20802	4.89052e-16	9.74657e-14	-7.16233	8.96634e-21	2.21261e-19	3.89012	7.04418e-12	8.32805e-10	-5.93362	2.55988e-18	6.83266e-17	T22P11_170	Plant protein 1589 of unknown function
AT4G35720	5.17202	3.65467e-14	6.11821e-12	-19.5527	6.65566e-33	3.24653e-31	11.8227	4.88957e-27	2.8422e-24	-9.478	6.11271e-24	2.48861e-22	F8D20.230	Arabidopsis protein of unknown function (DUF241)
AT3G28857	5.15858	2.24208e-07	1.33289e-05	-13.4564	1.96887e-11	1.90215e-10	4.20552	3.315e-08	2.08945e-06	-8.0923	2.83562e-13	4.64306e-12	PRE5	basic helix-loop-helix (bHLH) DNA-binding family protein
AT3G62100	5.07526	1.37867e-07	8.61197e-06	-5.05431	1.4981e-07	8.67922e-07	8.1822	4.2861e-14	6.95278e-12	-3.45959	9.6823e-08	7.23718e-07	IAA30	indole-3-acetic acid inducible 30
AT3G50800	5.02395	4.07029e-20	1.29053e-17	-5.1246	2.02028e-20	4.87054e-19	7.93723	5.73215e-31	4.6135e-28	-3.40729	5.92517e-15	1.15987e-13	F18B3.80	unknown protein; FUNCTIONS IN: molecular_function unknown; INVOLVED IN: N-terminal protein myristoylation; LOCATED IN: cellular_component unknown; BEST Arabidopsis thaliana protein match is: unknown protein (TAIR:AT5G66580.1); Has 249 Blast hits to /.../oteins in 14 species: Archae - 0; Bacteria - 0; Metazoa - 0; Fungi - 0; Plants - 249; Viruses - 0; Other Eukaryotes - 0 (source: NCBI BLink).
AT5G66580	4.97945	8.975e-28	5.86909e-25	-3.61523	3.50168e-19	7.56985e-18	3.40925	1.88983e-17	4.44343e-15	-2.12035	7.08159e-08	5.43216e-07	AT5G66580	unknown protein; FUNCTIONS IN: molecular_function unknown; INVOLVED IN: N-terminal protein myristoylation; LOCATED IN: cellular_component unknown; BEST Arabidopsis thaliana protein match is: unknown protein (TAIR:AT3G50800.1); Has 1807 Blast hits to /.../proteins in 277 species: Archae - 0; Bacteria - 0; Metazoa - 736; Fungi - 347; Plants - 385; Viruses - 0; Other Eukaryotes - 339 (source: NCBI B…
AT4G30290	4.90611	1.10658e-12	1.51349e-10	-10.649	7.92794e-24	2.43255e-22	7.02122	1.53939e-17	3.70268e-15	-5.87071	4.6001e-15	9.14166e-14	XTH19	xyloglucan endotransglucosylase/hydrolase 19
AT4G16515	4.83049	2.10482e-22	8.8091e-20	-5.45018	3.15471e-25	1.0462e-23	3.80512	7.21087e-17	1.60526e-14	-2.81874	3.00748e-11	3.83747e-10	RGF6	Encodes a root meristem growth factor (RGF). Belongs to a family of functionally redundant homologous peptides that are secreted, tyrosine-sulfated, and expressed mainly in the stem cell area and the innermost layer of central columella cells. RGFs /.../equired for maintenance of the root stem cell niche and transit amplifying cell proliferation. Members of this family include: At5g60810 (RGF1), …
AT5G03890	4.79022	1.82445e-13	2.80724e-11	-7.57043	1.31913e-18	2.66707e-17	4.66589	4.80648e-12	5.78049e-10	-2.80884	2.51386e-07	1.7629e-06	F8F6_100	unknown protein; INVOLVED IN: N-terminal protein myristoylation; LOCATED IN: cellular_component unknown; BEST Arabidopsis thaliana protein match is: unknown protein (TAIR:AT3G10120.1); Has 1807 Blast hits to 1807 proteins in 277 species: Archae - 0; /.../ria - 0; Metazoa - 736; Fungi - 347; Plants - 385; Viruses - 0; Other Eukaryotes - 339 (source: NCBI BLink).
AT3G03830	4.63988	4.87996e-06	0.000202615	-6.27832	1.28117e-07	7.50132e-07	2.60765	0.00321958	0.0385649	-4.92374	3.26353e-06	1.85628e-05	SAUR28	SAUR-like auxin-responsive protein family
AT4G27260	4.60308	9.31722e-21	3.36159e-18	-9.42088	6.69264e-39	4.29602e-37	4.29512	3.31494e-19	9.37412e-17	-5.12915	2.23909e-23	8.62896e-22	GH3.5/GH3a/WES1	Auxin-responsive GH3 family protein
AT5G52310	4.5838	5.78765e-08	3.80856e-06	-4.4318	1.07031e-07	6.33949e-07	5.98399	3.38651e-10	2.99013e-08	-5.53928	1.56436e-09	1.5544e-08	COR78	low-temperature-responsive protein 78 (LTI78) / desiccation-responsive protein 29A (RD29A)
AT1G21980	4.48869	2.8313e-64	1.18495e-60	-4.10964	8.32486e-58	9.78685e-56	4.26074	3.40814e-60	1.42637e-56	-2.35801	8.45421e-24	3.41112e-22	ATPIP5K1	phosphatidylinositol-4-phosphate 5-kinase 1
AT4G24275	4.22161	1.8924e-21	7.33339e-19	-6.90045	5.17241e-34	2.6992e-32	3.57983	1.00927e-16	2.2e-14	-3.26364	4.05048e-15	8.09554e-14	AT4G24275	Identified as a screen for stress-responsive genes.
AT1G77200	4.22119	1.20881e-16	2.55512e-14	-10.1474	7.92157e-32	3.61148e-30	3.4632	1.50125e-12	1.96345e-10	-4.29037	1.74336e-16	4.00017e-15	ERF037	Integrase-type DNA-binding superfamily protein
AT1G29395	4.10721	1.36443e-07	8.54853e-06	-7.64788	2.58689e-13	3.16568e-12	4.56154	1.76596e-08	1.18444e-06	-7.2165	9.05659e-13	1.38234e-11	COR414-TM1	COLD REGULATED 314 INNER MEMBRANE 1
AT4G10020	4.07545	0.00286719	0.038659	-10.0007	3.12758e-05	0.00012079	3.61982	0.00841142	0.0793228	-8.83199	8.90785e-05	0.000378412	AtHSD5	hydroxysteroid dehydrogenase 5
AT5G66080	4.06879	1.84293e-23	9.1822e-21	-3.33275	2.72456e-18	5.39396e-17	4.30331	9.5009e-25	4.51854e-22	-2.46402	1.64738e-11	2.16403e-10	APD9	Protein phosphatase 2C family protein
AT4G14140	3.99664	4.56389e-07	2.47419e-05	-12.6121	1.82631e-16	3.02941e-15	4.83186	2.9495e-08	1.88553e-06	-5.61698	1.68071e-09	1.66291e-08	MET2	DNA methyltransferase 2
AT1G09570	3.97021	4.38348e-46	1.01921e-42	-6.36349	3.61138e-77	7.1973e-75	4.68707	2.08331e-56	6.2279e-53	-3.96177	4.18942e-46	4.03999e-44	PHYA	phytochrome A
AT4G25260	3.95463	1.12067e-34	1.11672e-31	-4.99423	2.61341e-45	2.02549e-43	4.1373	1.57841e-36	1.94293e-33	-2.37389	1.44248e-15	3.04288e-14	RIP	Plant invertase/pectin methylesterase inhibitor superfamily protein
AT3G53232	3.91963	0.000225631	0.00540843	-147.65	2.70421e-12	2.93508e-11	5.32318	7.18659e-05	0.00179245	-32.2534	1.66455e-09	1.6477e-08	RTFL1	ROTUNDIFOLIA like 1
AT5G12050	3.91963	1.59476e-15	2.98521e-13	-5.96296	3.31908e-24	1.03975e-22	3.47818	2.48835e-13	3.61605e-11	-3.56401	8.34201e-14	1.44105e-12	F14F18_220	unknown protein; BEST Arabidopsis thaliana protein match is: unknown protein (TAIR:AT3G13980.1); Has 1807 Blast hits to 1807 proteins in 277 species: Archae - 0; Bacteria - 0; Metazoa - 736; Fungi - 347; Plants - 385; Viruses - 0; Other Eukaryotes - /.../source: NCBI BLink).
AT5G47370	3.88587	9.84115e-34	9.36072e-31	-7.29362	6.09999e-64	8.45354e-62	2.72607	1.02425e-19	3.06193e-17	-5.0582	1.72022e-45	1.63624e-43	HAT2	Homeobox-leucine zipper protein 4 (HB-4) / HD-ZIP protein
AT5G09970	3.75374	1.21278e-07	7.66724e-06	-54.0501	8.46464e-30	3.51451e-28	5.99366	8.15564e-12	9.48138e-10	-11.5866	1.88233e-18	5.06293e-17	CYP78A7	cytochrome P450, family 78, subfamily A, polypeptide 7
AT3G48260	3.69936	1.278e-13	1.99578e-11	-8.97411	5.93278e-30	2.47803e-28	3.12808	7.65585e-11	7.52142e-09	-3.61345	2.96947e-13	4.85462e-12	WNK3	with no lysine (K) kinase 3
AT3G55840	3.69696	7.00316e-08	4.56467e-06	-3.96562	1.92111e-08	1.26738e-07	2.40468	0.00026251	0.005158	-3.80852	9.37449e-08	7.02869e-07	HSPRO1	Hs1pro-1 protein
AT2G42990	3.66207	2.13636e-07	1.2773e-05	-4.50564	7.38266e-09	5.15137e-08	4.27139	2.52994e-09	1.95356e-07	-4.43904	3.72955e-10	4.11627e-09	AT2G42990	GDSL-like Lipase/Acylhydrolase superfamily protein
AT4G32460	3.64304	4.36155e-20	1.36224e-17	-6.56066	8.52776e-38	5.24858e-36	3.83721	2.3931e-21	8.7856e-19	-3.50346	4.82147e-19	1.37458e-17	AT4G32460	Protein of unknown function, DUF642
AT3G42800	3.59767	8.30336e-11	9.19344e-09	-6.17296	2.32041e-18	4.61129e-17	2.30418	2.08085e-05	0.000632906	-5.21838	4.88591e-15	9.67289e-14	T21C14_20	unknown protein; BEST Arabidopsis thaliana protein match is: unknown protein (TAIR:AT1G54200.1); Has 853 Blast hits to 340 proteins in 98 species: Archae - 0; Bacteria - 94; Metazoa - 145; Fungi - 62; Plants - 95; Viruses - 0; Other Eukaryotes - 457 /.../ce: NCBI BLink).
AT2G14960	3.54748	1.43357e-06	6.74132e-05	-6.89089	9.21411e-12	9.30123e-11	3.10626	2.71262e-05	0.000795306	-4.27053	1.61251e-07	1.16477e-06	GH3.1	Auxin-responsive GH3 family protein
AT1G67900	3.54429	1.29003e-26	8.18034e-24	-4.03861	1.44059e-31	6.49694e-30	2.47342	8.70334e-15	1.53047e-12	-2.26913	1.66915e-12	2.47196e-11	AT1G67900	Phototropic-responsive NPH3 family protein
AT5G57240	3.51651	6.62242e-09	5.41326e-07	-30.7755	2.87459e-40	1.9036e-38	4.30196	3.02574e-11	3.18174e-09	-9.79266	8.89764e-23	3.31303e-21	ORP4C	OSBP(oxysterol binding protein)-related protein 4C
AT1G77860	3.5043	0.000397425	0.00861816	-4.94818	2.68721e-05	0.000105068	1.89372	0.0537203	0.275283	-1.83896	0.0571379	0.108372	KOM	Rhomboid-related intramembrane serine protease family protein
AT5G44440	3.47548	0.000353065	0.00780173	-5.83733	9.21898e-07	4.70987e-06	2.64694	0.00454067	0.0497999	-2.5456	0.00634538	0.016454	AT5G44440	FAD-binding Berberine family protein
AT5G14920	3.44994	1.14934e-20	4.00852e-18	-5.55423	2.97984e-36	1.7178e-34	3.12378	8.072e-18	2.05994e-15	-2.71311	3.2365e-14	5.88419e-13	GASA14	Gibberellin-regulated family protein
AT1G69570	3.40193	4.93057e-17	1.08607e-14	-3.85577	5.95816e-20	1.38074e-18	2.83073	5.14719e-13	7.13312e-11	-2.96207	3.18218e-14	5.79046e-13	CDF5	Dof-type zinc finger DNA-binding family protein
AT4G37390	3.35216	1.4223e-06	6.70339e-05	-6.63224	5.19307e-13	6.11193e-12	2.57625	0.000144999	0.00321765	-5.33182	1.02689e-10	1.21474e-09	GH3.2/YDK1/AUR3/BRU6	Auxin-responsive GH3 family protein
AT5G05965	3.34916	0.000179634	0.00449644	-15.5854	1.11876e-10	9.94952e-10	5.91405	1.00627e-08	7.11389e-07	-2.27812	0.00200682	0.00602076	AT5G05965	unknown protein; FUNCTIONS IN: molecular_function unknown; INVOLVED IN: biological_process unknown; LOCATED IN: chloroplast; BEST Arabidopsis thaliana protein match is: unknown protein (TAIR:AT2G39855.2); Has 30201 Blast hits to 17322 proteins in 78 /.../ies: Archae - 12; Bacteria - 1396; Metazoa - 17338; Fungi - 3422; Plants - 5037; Viruses - 0; Other Eukaryotes - 2996 (source: NCBI BLink).
AT1G05490	3.34821	7.85231e-08	5.05592e-06	-2.47102	2.37698e-05	9.39211e-05	3.3529	8.98046e-08	5.06537e-06	-2.04165	0.00047144	0.00167693	chr31	chromatin remodeling 31
AT4G22545	3.34231	2.65306e-06	0.000116634	-12.1447	1.75218e-14	2.42983e-13	2.21038	0.00326876	0.0388648	-3.71334	4.50492e-06	2.50318e-05	AT4G22545	pseudogene of unknown protein
AT1G01390	3.33966	1.77726e-17	4.32453e-15	-3.64562	1.51316e-19	3.39019e-18	5.17273	1.68657e-29	1.03803e-26	-2.27547	6.59924e-10	6.99219e-09	UGT72B2	UDP-Glycosyltransferase superfamily protein
AT1G77870	3.30512	1.18309e-05	0.000444478	-18.0663	1.16994e-16	1.98076e-15	4.16811	2.61553e-07	1.32846e-05	-8.74485	5.07031e-13	8.04408e-12	MUB5	membrane-anchored ubiquitin-fold protein 5 precursor
AT2G28400	3.21476	2.05387e-05	0.000715128	-5.33058	5.51085e-09	3.90122e-08	9.67578	1.57301e-14	2.67617e-12	-6.82205	9.86501e-12	1.33615e-10	AT2G28400	Protein of unknown function, DUF584
AT1G26945	3.211	1.30781e-22	5.92733e-20	-5.00181	1.97572e-38	1.25285e-36	2.53011	3.28321e-15	5.9743e-13	-3.08129	2.01243e-21	6.75957e-20	KDR	basic helix-loop-helix (bHLH) DNA-binding superfamily protein
AT3G20395	3.19959	2.79945e-05	0.000940831	-5.99783	8.17262e-10	6.48295e-09	3.94585	1.16663e-06	5.16131e-05	-3.26351	1.98984e-05	9.81828e-05	AT3G20395	RING/U-box superfamily protein
AT1G02380	3.18422	1.82081e-10	1.92436e-08	-2.45149	4.17343e-07	2.26252e-06	2.56288	1.97887e-07	1.04045e-05	-2.15095	1.32844e-05	6.79182e-05	T6A9.7	unknown protein; BEST Arabidopsis thaliana protein match is: unknown protein (TAIR:AT4G01960.1); Has 66 Blast hits to 66 proteins in 11 species: Archae - 0; Bacteria - 0; Metazoa - 0; Fungi - 0; Plants - 66; Viruses - 0; Other Eukaryotes - 0 (source /.../ BLink).
AT4G36010	3.15693	1.28598e-08	9.75013e-07	-2.17643	7.78257e-05	0.000277725	3.8231	1.39207e-10	1.3063e-08	-2.94891	8.30938e-08	6.29779e-07	T19K4.140	Pathogenesis-related thaumatin superfamily protein
AT3G03850	3.13392	9.98804e-08	6.39173e-06	-4.04339	2.29917e-10	1.95579e-09	1.77131	0.00580244	0.0602347	-2.91494	6.13455e-07	4.02419e-06	SAUR26	SAUR-like auxin-responsive protein family
AT3G54030	3.10507	1.80995e-25	1.08214e-22	-3.81865	5.5481e-34	2.86666e-32	3.55057	7.5886e-31	5.88145e-28	-3.7959	3.62181e-34	2.26239e-32	F5K20_330	Protein kinase protein with tetratricopeptide repeat domain
AT4G34770	3.08256	1.71976e-08	1.2807e-06	-8.49297	9.12742e-21	2.24706e-19	3.21285	1.40471e-08	9.67646e-07	-3.7682	1.23352e-10	1.44771e-09	SAUR1	SAUR-like auxin-responsive protein family
AT1G75590	3.0766	7.28122e-06	0.000288574	-2.04406	0.00221795	0.00577417	2.371	0.000267434	0.00522532	-2.0595	0.00135029	0.00425353	SAUR52	SAUR-like auxin-responsive protein family
AT3G61460	3.02817	1.7536e-37	2.29348e-34	-3.48044	3.84949e-46	3.0629e-44	2.91031	7.75052e-35	8.10937e-32	-2.35472	8.37107e-24	3.38826e-22	BRH1	brassinosteroid-responsive RING-H2
AT4G25470	3.02195	2.31629e-06	0.00010357	-2.44241	9.00078e-05	0.000316928	4.64314	1.10657e-10	1.04778e-08	-4.43938	1.23752e-10	1.45159e-09	CBF2	C-repeat/DRE binding factor 2
AT1G05835	2.99865	9.59053e-12	1.16007e-09	-3.77811	7.38652e-16	1.14922e-14	2.90434	4.63106e-11	4.65911e-09	-2.17789	6.05934e-07	3.97984e-06	AT1G05835	PHD finger protein
AT1G76610	2.9978	0.00142499	0.0228676	-6.21845	3.09009e-06	1.43664e-05	4.08196	2.48337e-05	0.000739217	-4.41784	7.0651e-06	3.79477e-05	F14G6.21	Protein of unknown function, DUF617
AT1G56150	2.9839	0.000191198	0.00474054	-5.11236	1.32942e-07	7.7643e-07	3.06236	0.000129441	0.00294422	-2.75166	0.000418108	0.00150798	SAUR71	SAUR-like auxin-responsive protein family
AT1G64640	2.95238	9.47839e-21	3.36178e-18	-7.11785	6.04365e-56	6.45252e-54	2.49311	2.7172e-15	4.98772e-13	-4.12499	1.0798e-32	6.45599e-31	ENODL8	early nodulin-like protein 8
AT4G23060	2.93353	4.13038e-14	6.85972e-12	-4.88133	1.58727e-26	5.57301e-25	3.70456	1.33656e-19	3.93928e-17	-4.03043	4.37174e-22	1.55056e-20	IQD22	IQ-domain 22
AT2G41850	2.87304	0.00231265	0.0330563	-2.51225	0.0071379	0.0163798	1.93723	0.0491328	0.261223	-1.49427	0.223247	0.332568	PGAZAT	polygalacturonase abscission zone A. thaliana
AT1G02660	2.84605	1.59774e-15	2.98521e-13	-6.07789	9.91568e-38	6.06712e-36	3.22432	1.05938e-18	2.84211e-16	-5.71227	1.28128e-36	9.11978e-35	T14P4.6	alpha/beta-Hydrolases superfamily protein
AT5G08760	2.83974	0.000984627	0.0174317	-4.16757	1.05072e-05	4.45045e-05	2.20512	0.0122071	0.10436	-2.15326	0.0144942	0.0335998	AT5G08760	unknown protein; FUNCTIONS IN: molecular_function unknown; INVOLVED IN: biological_process unknown; LOCATED IN: endomembrane system; Has 3 Blast hits to 3 proteins in 2 species: Archae - 0; Bacteria - 0; Metazoa - 0; Fungi - 0; Plants - 3; Viruses - /.../her Eukaryotes - 0 (source: NCBI BLink).
AT1G10070	2.80604	4.60542e-05	0.00145579	-8.05577	4.25105e-12	4.47923e-11	2.50149	0.00011545	0.0026592	-8.5018	2.51431e-14	4.61125e-13	ATBCAT-2	branched-chain amino acid transaminase 2
AT2G31980	2.78689	3.94971e-07	2.17504e-05	-4.99455	7.34759e-14	9.57382e-13	3.82081	1.30579e-11	1.46122e-09	-5.1857	2.6992e-16	6.04101e-15	AtCYS2	PHYTOCYSTATIN 2
AT1G06350	2.78237	4.39976e-10	4.34289e-08	-10.0259	4.18425e-34	2.19448e-32	3.31564	1.85064e-12	2.34706e-10	-4.26667	3.42698e-17	8.2714e-16	ADS4	Fatty acid desaturase family protein
AT5G15160	2.77	9.1857e-07	4.5658e-05	-7.33657	2.11813e-17	3.84757e-16	2.21406	0.000107223	0.0024986	-3.23423	2.74094e-08	2.23876e-07	BNQ2/AtbHLH134	BANQUO 2
AT1G73120	2.7695	1.66941e-09	1.50757e-07	-2.63287	9.50703e-09	6.52062e-08	3.67241	2.60062e-14	4.31909e-12	-2.6864	4.26661e-09	3.95583e-08	T18K17.22	unknown protein; FUNCTIONS IN: molecular_function unknown; INVOLVED IN: response to oxidative stress; EXPRESSED IN: root, cultured cell; Has 36 Blast hits to 36 proteins in 8 species: Archae - 0; Bacteria - 0; Metazoa - 0; Fungi - 0; Plants - 36; Vi /.../- 0; Other Eukaryotes - 0 (source: NCBI BLink).
AT1G52190	2.75091	1.77327e-16	3.63798e-14	-5.97158	1.11293e-43	8.17164e-42	2.59486	6.45799e-15	1.14525e-12	-3.30916	3.40862e-22	1.21307e-20	AT1G52190	Major facilitator superfamily protein
AT1G10560	2.74616	3.85118e-07	2.12898e-05	-4.31707	1.02692e-11	1.03066e-10	3.287	2.14369e-09	1.67384e-07	-4.46968	1.9547e-13	3.26189e-12	PUB18	plant U-box 18
AT2G42800	2.72877	3.99629e-07	2.19492e-05	-4.46894	1.28522e-12	1.44672e-11	3.20243	7.25226e-09	5.32494e-07	-2.87472	5.68237e-08	4.41222e-07	AtRLP29	receptor like protein 29
AT2G14900	2.72345	1.05935e-14	1.86285e-12	-3.10093	5.4265e-18	1.03326e-16	2.70634	2.10709e-14	3.54988e-12	-2.4743	1.7427e-12	2.56815e-11	GASA7	Gibberellin-regulated family protein
AT3G03840	2.69065	5.91434e-06	0.000241254	-6.38569	1.43572e-14	2.01098e-13	1.70065	0.0136129	0.113176	-2.58963	1.6432e-05	8.26776e-05	SAUR27	SAUR-like auxin-responsive protein family
AT2G19660	2.68627	2.29004e-07	1.3499e-05	-8.26061	5.29598e-21	1.32564e-19	2.81277	1.25448e-07	6.78326e-06	-6.25994	1.15913e-17	2.91187e-16	AT2G19660	Cysteine/Histidine-rich C1 domain family protein
AT5G52910	2.68168	5.20253e-08	3.48936e-06	-3.02988	1.3017e-09	1.00218e-08	2.85523	8.85333e-09	6.34468e-07	-2.10195	3.10893e-05	0.000147122	ATIM	timeless family protein
AT3G16800	2.68124	1.24366e-28	8.67496e-26	-2.88254	2.08356e-32	9.79787e-31	2.96574	3.88945e-34	3.69957e-31	-2.68395	2.38754e-29	1.23362e-27	AT3G16800	Protein phosphatase 2C family protein
AT1G13260	2.67874	1.49354e-12	2.01637e-10	-2.5904	7.65372e-12	7.78618e-11	3.20537	1.08555e-16	2.31798e-14	-2.28009	2.10995e-09	2.05362e-08	RAV1	related to ABI3/VP1 1
AT3G58850	2.62722	3.10852e-07	1.77245e-05	-3.11906	2.7957e-09	2.05996e-08	2.20948	2.64688e-05	0.000781222	-2.16839	3.3884e-05	0.000159052	PAR2/HLH2	phy rapidly regulated 2
AT1G29440	2.6265	6.67291e-11	7.42751e-09	-2.40561	2.39269e-09	1.77551e-08	1.79884	5.65454e-05	0.00147173	-1.41549	0.0147866	0.0341754	SAUR63	SAUR-like auxin-responsive protein family
AT2G22830	2.61691	1.05176e-16	2.24582e-14	-4.8544	3.13591e-37	1.88029e-35	1.81887	2.37357e-07	1.22338e-05	-2.26889	2.10946e-12	3.07186e-11	SQE2	squalene epoxidase 2
AT5G62170	2.61073	1.08641e-11	1.29155e-09	-4.23238	9.28441e-22	2.44384e-20	2.88132	5.8706e-14	9.16778e-12	-3.08095	7.09999e-16	1.54123e-14	AT5G62170/MTG10_190	unknown protein; BEST Arabidopsis thaliana protein match is: unknown protein (TAIR:AT5G51850.1); Has 381 Blast hits to 359 proteins in 81 species: Archae - 0; Bacteria - 16; Metazoa - 101; Fungi - 21; Plants - 99; Viruses - 3; Other Eukaryotes - 141 /.../ce: NCBI BLink).
AT3G10720	2.60226	3.05758e-09	2.66595e-07	-4.18208	4.21425e-18	8.16549e-17	2.38826	6.54672e-08	3.83744e-06	-2.12311	2.63858e-06	1.52769e-05	PME25	Plant invertase/pectin methylesterase inhibitor superfamily
AT1G11545	2.57693	6.7158e-18	1.71384e-15	-4.69887	8.74135e-42	6.03701e-40	2.21085	4.38885e-13	6.12274e-11	-2.79605	1.33665e-20	4.21881e-19	XTH8	xyloglucan endotransglucosylase/hydrolase 8
AT5G15150	2.56216	8.87837e-09	7.06421e-07	-4.97278	4.8945e-20	1.13929e-18	2.38552	2.72815e-07	1.38231e-05	-3.47396	6.73877e-13	1.04766e-11	ATHB-3	homeobox 3
AT1G10060	2.54735	1.12553e-10	1.22035e-08	-2.7024	8.337e-12	8.45252e-11	2.60339	4.10332e-11	4.18859e-09	-2.30446	5.72384e-09	5.20544e-08	ATBCAT-1	branched-chain amino acid transaminase 1
AT5G28300	2.53493	4.42565e-24	2.37464e-21	-4.93391	6.63051e-61	8.35844e-59	2.71461	1.7642e-27	1.05479e-24	-3.4104	5.54782e-40	4.48238e-38	AT5G28300	Duplicated homeodomain-like superfamily protein
AT2G21200	2.52175	0.000153462	0.00396952	-3.0744	7.92398e-06	3.4168e-05	1.56498	0.061424	0.298669	-3.17265	8.8741e-06	4.67992e-05	SAUR7	SAUR-like auxin-responsive protein family
AT5G67060	2.51529	7.3758e-05	0.00216171	-7.71539	5.0461e-14	6.69593e-13	2.31813	0.000320629	0.0060555	-6.00428	5.32771e-12	7.45239e-11	HEC1/AtbHLH88	basic helix-loop-helix (bHLH) DNA-binding superfamily protein
AT3G03820	2.51375	5.29277e-07	2.79688e-05	-4.98236	2.91999e-16	4.75886e-15	1.7856	0.0015647	0.0217753	-3.05981	3.9977e-09	3.73464e-08	SAUR29	SAUR-like auxin-responsive protein family
AT2G14890	2.49307	1.7555e-15	3.25093e-13	-4.38211	5.65134e-36	3.20488e-34	2.29937	3.70361e-13	5.23661e-11	-2.74543	1.93201e-18	5.1899e-17	AGP9	arabinogalactan protein 9
AT1G64660	2.49274	2.28773e-21	8.70418e-19	-3.04177	5.30062e-30	2.22286e-28	3.29428	1.22436e-34	1.22004e-31	-2.66902	3.69907e-25	1.59273e-23	ATMGL	methionine gamma-lyase
AT4G25420	2.48605	0.000251791	0.00591356	-8.91412	5.13588e-14	6.81074e-13	1.22407	0.398882	0.755092	-3.51918	1.29121e-06	7.95639e-06	GA20OX1	2-oxoglutarate (2OG) and Fe(II)-dependent oxygenase superfamily protein
AT1G29460	2.46759	3.38162e-06	0.000145905	-3.4033	8.44407e-10	6.68814e-09	1.92893	0.000681494	0.0111851	-2.08708	0.000129858	0.000531991	SAUR65	SAUR-like auxin-responsive protein family
AT1G23052	2.46511	8.18054e-06	0.000320573	-8.00766	4.22666e-19	9.09015e-18	2.44608	8.47275e-06	0.000288496	-6.00554	2.58354e-16	5.80077e-15	AT1G23052	0
AT5G15580	2.45353	1.05961e-11	1.26705e-09	-4.50224	7.92396e-28	3.00393e-26	2.28235	4.15341e-10	3.6064e-08	-2.54181	1.72508e-12	2.54757e-11	LNG1	longifolia1
AT5G15581	2.45279	0.000512739	0.0104986	-6.01555	8.03866e-09	5.58675e-08	1.35213	0.252489	0.620359	-3.54499	5.6186e-05	0.000250479	AT5G15581	unknown protein; FUNCTIONS IN: molecular_function unknown; INVOLVED IN: biological_process unknown; LOCATED IN: cellular_component unknown; EXPRESSED IN: leaf apex; Has 30201 Blast hits to 17322 proteins in 780 species: Archae - 12; Bacteria - 1396; /.../oa - 17338; Fungi - 3422; Plants - 5037; Viruses - 0; Other Eukaryotes - 2996 (source: NCBI BLink).
AT3G43960	2.45176	2.36663e-17	5.50269e-15	-2.60553	2.1752e-19	4.81164e-18	2.80616	6.20959e-22	2.49888e-19	-2.31297	7.75802e-16	1.67538e-14	AT3G43960	Cysteine proteinases superfamily protein
AT5G12940	2.44717	2.81009e-15	5.11339e-13	-2.93211	5.35445e-21	1.33868e-19	2.32984	9.30646e-14	1.44257e-11	-2.15678	8.83401e-12	1.20509e-10	T24H18_110	Leucine-rich repeat (LRR) family protein
AT1G29450	2.43559	1.94977e-06	8.88907e-05	-3.16724	1.47339e-09	1.12444e-08	1.72154	0.00348502	0.0408329	-2.31981	7.55434e-06	4.03786e-05	SAUR64	SAUR-like auxin-responsive protein family
AT5G06870	2.4328	2.27643e-09	2.0185e-07	-8.87496	4.04294e-41	2.72911e-39	1.75893	0.000131088	0.00295916	-6.02285	7.72349e-30	4.10207e-28	PGIP2	polygalacturonase inhibiting protein 2
AT3G62570	2.41199	2.60551e-06	0.000114785	-4.15436	2.20831e-12	2.41942e-11	1.14623	0.458508	0.794135	-2.64858	1.48025e-06	9.01767e-06	AT3G62570	Tetratricopeptide repeat (TPR)-like superfamily protein
AT3G25717	2.38402	6.64822e-09	5.41326e-07	-2.94686	9.70072e-13	1.10625e-11	1.76516	0.000122221	0.00279824	-2.13635	3.29388e-07	2.27109e-06	RTFL16	ROTUNDIFOLIA like 16
AT1G29420	2.38132	0.00303628	0.04029	-4.08254	9.62948e-06	4.09816e-05	3.09903	0.000388971	0.00709643	-2.39181	0.00348085	0.00972241	SAUR61	SAUR-like auxin-responsive protein family
AT3G13980	2.3726	2.7971e-12	3.59093e-10	-4.34252	2.33875e-29	9.46627e-28	1.80661	1.25102e-06	5.46532e-05	-2.67124	2.82691e-15	5.7433e-14	AT3G13980	unknown protein; BEST Arabidopsis thaliana protein match is: unknown protein (TAIR:AT1G54200.1); Has 1485 Blast hits to 418 proteins in 98 species: Archae - 0; Bacteria - 6; Metazoa - 246; Fungi - 61; Plants - 107; Viruses - 6; Other Eukaryotes - 10 /.../urce: NCBI BLink).
AT4G38825	2.36069	2.75698e-06	0.000120696	-6.31973	8.60781e-19	1.7729e-17	2.36236	6.10916e-06	0.000217046	-3.33227	6.564e-10	6.9619e-09	SAUR13	SAUR-like auxin-responsive protein family
AT3G12710	2.3509	2.60158e-08	1.86441e-06	-6.0761	3.55187e-28	1.35385e-26	2.20407	3.20948e-07	1.60674e-05	-3.14386	3.18363e-13	5.18448e-12	AT3G12710	DNA glycosylase superfamily protein
AT2G35880	2.34202	1.0133e-18	2.7185e-16	-3.54194	1.03582e-37	6.31939e-36	1.99303	7.17767e-13	9.75324e-11	-2.46667	1.00966e-20	3.22566e-19	AT2G35880	TPX2 (targeting protein for Xklp2) protein family
AT1G11000	2.33707	2.00652e-17	4.77142e-15	-3.38946	6.75039e-32	3.09778e-30	2.08678	3.50695e-13	5.02647e-11	-2.51126	1.25197e-19	3.70561e-18	MLO4	Seven transmembrane MLO family protein
AT2G12462	2.33625	3.90427e-11	4.48905e-09	-4.02627	1.13003e-25	3.80177e-24	2.47357	1.93241e-12	2.41919e-10	-3.47817	1.43268e-21	4.89875e-20	AT2G12462	BEST Arabidopsis thaliana protein match is: Sterile alpha motif (SAM) domain-containing protein (TAIR:AT1G15760.1); Has 35333 Blast hits to 34131 proteins in 2444 species: Archae - 798; Bacteria - 22429; Metazoa - 974; Fungi - 991; Plants - 531; Vir /.../ 0; Other Eukaryotes - 9610 (source: NCBI BLink).
AT5G60860	2.2965	6.80925e-13	9.56311e-11	-2.09632	1.27973e-10	1.12804e-09	2.20016	8.04467e-12	9.40462e-10	-2.02699	5.80435e-10	6.23201e-09	AtRABA1f	RAB GTPase homolog A1F
AT5G27220	2.29106	0.000575978	0.0115671	-2.71715	4.78325e-05	0.00017874	1.59112	0.0538326	0.275759	-1.59269	0.0494074	0.0957226	A_TM021B04.7	Frigida-like protein
AT1G14920	2.2907	1.42045e-17	3.49697e-15	-4.8793	3.09785e-54	3.08694e-52	2.47058	1.35877e-20	4.51329e-18	-2.81441	2.44534e-26	1.12464e-24	GAI	GRAS family transcription factor family protein
AT3G55240	2.27152	2.2593e-08	1.64732e-06	-17.1548	1.76972e-62	2.34387e-60	2.65463	2.84542e-11	3.00724e-09	-9.75247	1.32919e-46	1.31201e-44	T26I12.120	Plant protein 1589 of unknown function
AT5G65390	2.27111	9.23671e-06	0.00035924	-3.72947	4.16194e-12	4.38976e-11	2.0568	9.73991e-05	0.00231874	-2.76275	5.60106e-08	4.35393e-07	AGP7	arabinogalactan protein 7
AT1G21050	2.26689	2.67559e-14	4.5893e-12	-3.50319	9.72912e-30	4.00771e-28	3.21307	1.00897e-26	5.55622e-24	-2.80894	7.20061e-22	2.51553e-20	T22I11.13	Protein of unknown function, DUF617
AT1G62440	2.24354	0.00161276	0.024999	-3.47896	1.90231e-06	9.19761e-06	1.84894	0.0164028	0.128667	-3.82149	3.94192e-07	2.67728e-06	LRX2	leucine-rich repeat/extensin 2
AT1G18710	2.23606	0.000147925	0.0038597	-3.69898	3.13841e-09	2.2939e-08	3.15222	4.98036e-07	2.39034e-05	-3.1929	2.62425e-07	1.8354e-06	AtMYB47	myb domain protein 47
AT4G18970	2.20792	7.10669e-14	1.14396e-11	-3.46224	1.62853e-30	6.99767e-29	1.57255	1.59373e-05	0.000499256	-2.51414	4.99242e-18	1.30426e-16	AT4G18970	GDSL-like Lipase/Acylhydrolase superfamily protein
AT5G55250	2.20507	7.59289e-05	0.00220679	-2.68455	1.66072e-06	8.09696e-06	1.76063	0.0035164	0.0410626	-1.50798	0.0266152	0.0567736	IAMT1	IAA carboxylmethyltransferase 1
AT3G28180	2.19688	1.37817e-17	3.43329e-15	-5.19331	1.34747e-64	1.90522e-62	1.82538	5.69791e-11	5.65092e-09	-3.26597	3.32608e-36	2.31234e-34	ATCSLC04	Cellulose-synthase-like C4
AT3G50890	2.18732	1.836e-06	8.42546e-05	-5.68959	7.09115e-21	1.75817e-19	1.58473	0.00402278	0.0455524	-2.88319	3.10333e-10	3.44877e-09	AtHB28	homeobox protein 28
AT1G23060	2.17593	0.00284309	0.0383587	-5.22355	8.14211e-09	5.65301e-08	2.69861	0.000206289	0.00426141	-5.28141	5.67429e-09	5.16262e-08	T26J12.16	BEST Arabidopsis thaliana protein match is: TPX2 (targeting protein for Xklp2) protein family (TAIR:AT1G70950.1); Has 35333 Blast hits to 34131 proteins in 2444 species: Archae - 798; Bacteria - 22429; Metazoa - 974; Fungi - 991; Plants - 531; Virus /.../; Other Eukaryotes - 9610 (source: NCBI BLink).
AT3G54510	2.16895	7.88681e-05	0.00227327	-3.0389	5.49666e-08	3.40708e-07	2.07307	0.000100091	0.00236934	-2.83986	4.91945e-08	3.86283e-07	T14E10_80	Early-responsive to dehydration stress protein (ERD4)
AT5G02200	2.16726	0.00358035	0.0452067	-6.15967	5.85792e-10	4.72381e-09	3.47261	3.67197e-06	0.000139455	-3.80716	6.36475e-07	4.16215e-06	FHL	far-red-elongated hypocotyl1-like
AT1G11120	2.16486	2.38839e-05	0.000812673	-2.38751	2.61008e-06	1.22738e-05	2.00545	0.000224518	0.00454818	-2.15625	3.7532e-05	0.000174338	AT1G11120	unknown protein; BEST Arabidopsis thaliana protein match is: unknown protein (TAIR:AT1G09812.1); Has 270 Blast hits to 255 proteins in 62 species: Archae - 0; Bacteria - 2; Metazoa - 93; Fungi - 14; Plants - 126; Viruses - 0; Other Eukaryotes - 35 ( /.../: NCBI BLink).
AT4G11610	2.15778	0.000771302	0.0145146	-2.78392	1.12716e-05	4.73921e-05	2.79173	1.35703e-05	0.000436208	-2.47657	8.89287e-05	0.000378036	AT4G11620	C2 calcium/lipid-binding plant phosphoribosyltransferase family protein
AT2G40610	2.15405	0.000792431	0.0148057	-3.75633	1.55702e-08	1.03855e-07	1.64212	0.0290011	0.187598	-2.79506	8.5708e-06	4.54287e-05	ATEXPA8	expansin A8
AT2G39220	2.15005	1.1409e-06	5.52649e-05	-2.92183	3.19879e-11	3.00844e-10	2.25234	1.5759e-07	8.36987e-06	-2.57522	1.04185e-09	1.06714e-08	PLP6	PATATIN-like protein 6
AT3G61830	2.13963	2.35242e-17	5.50269e-15	-4.10651	4.71728e-49	4.16514e-47	2.5266	6.48349e-25	3.1552e-22	-3.00845	2.83226e-34	1.78518e-32	ARF18	auxin response factor 18
AT5G08150	2.13766	0.00112401	0.0193909	-2.27133	0.000470304	0.00142549	1.35973	0.191888	0.546399	-1.78081	0.0158253	0.0362122	SOB5	suppressor of phytochrome b 5
AT5G10430	2.13612	1.54705e-05	0.000560097	-5.36882	7.17626e-20	1.65022e-18	1.82339	0.000616498	0.0102877	-3.75619	2.47207e-13	4.08361e-12	AGP4	arabinogalactan protein 4
AT3G62720	2.13044	1.86031e-12	2.46386e-10	-2.48562	5.02491e-17	8.82882e-16	1.8251	2.48004e-08	1.60673e-06	-2.0608	1.93098e-11	2.51448e-10	ATXT1/XXT1	xylosyltransferase 1
AT1G75300	2.12358	0.00203998	0.0298906	-2.76826	5.65941e-05	0.000208135	1.70994	0.0492635	0.261598	-2.19632	0.00429904	0.0116985	F22H5.16	NmrA-like negative transcriptional regulator family protein
AT1G26218	2.1224	0.000505673	0.0103946	-2.43758	5.1204e-05	0.000190217	1.95257	0.00178625	0.0242509	-2.35334	6.80593e-05	0.000298326	AT1G26218	other RNA
AT1G29500	2.11803	1.63083e-05	0.00058637	-2.73036	1.38142e-08	9.2861e-08	1.55612	0.0103777	0.093158	-1.82933	0.000479441	0.00170281	SAUR66	SAUR-like auxin-responsive protein family
AT5G01740	2.11752	4.28117e-07	2.32696e-05	-3.5602	1.12394e-16	1.90751e-15	1.72332	0.000220324	0.00448492	-2.30623	1.92445e-08	1.61536e-07	T20L15_10	Nuclear transport factor 2 (NTF2) family protein
AT1G09575	2.11462	2.85304e-07	1.64925e-05	-3.88708	1.1813e-17	2.19342e-16	2.66258	1.23255e-11	1.38668e-09	-3.77223	3.75036e-19	1.08099e-17	AT1G09575	Protein of unknown function (DUF607)
AT2G41540	2.11402	2.25933e-13	3.42599e-11	-2.19266	1.61708e-14	2.24993e-13	1.9338	1.02659e-10	9.80931e-09	-2.21671	7.29784e-15	1.41796e-13	GPDHC1	6-phosphogluconate dehydrogenase family protein
AT3G55760	2.11122	2.5996e-08	1.86441e-06	-2.15754	1.05572e-08	7.20076e-08	2.08043	5.53699e-08	3.30106e-06	-2.17877	6.63983e-09	5.97613e-08	AT3G55760	unknown protein; LOCATED IN: chloroplast stroma, chloroplast; EXPRESSED IN: 16 plant structures; EXPRESSED DURING: 10 growth stages; BEST Arabidopsis thaliana protein match is: unknown protein (TAIR:AT1G42430.2); Has 176 Blast hits to 125 proteins i /.../pecies: Archae - 0; Bacteria - 3; Metazoa - 19; Fungi - 9; Plants - 81; Viruses - 0; Other Eukaryotes - 64 (source: NCBI BLink).
AT3G58620	2.10831	1.27915e-10	1.37269e-08	-4.51438	2.74794e-34	1.45211e-32	1.85028	1.11691e-07	6.11843e-06	-3.14985	7.27441e-22	2.53707e-20	TTL4	tetratricopetide-repeat thioredoxin-like 4
AT2G47440	2.09445	2.21213e-09	1.96983e-07	-3.07845	3.89145e-19	8.37782e-18	1.74706	5.88597e-06	0.000211269	-1.93283	9.03464e-08	6.79823e-07	AT2G47440	Tetratricopeptide repeat (TPR)-like superfamily protein
AT5G43700	2.07784	2.10711e-12	2.77316e-10	-3.00922	2.6775e-25	8.92189e-24	1.9271	2.84231e-10	2.5507e-08	-2.09555	1.15909e-12	1.74874e-11	IAA4/ATAUX2-11	AUX/IAA transcriptional regulator family protein
AT3G12610	2.07681	2.36819e-16	4.81133e-14	-4.46683	1.91332e-58	2.2749e-56	1.71448	1.30682e-09	1.06407e-07	-2.82153	2.2316e-30	1.2289e-28	DRT100	Leucine-rich repeat (LRR) family protein
AT4G30410	2.0624	1.89334e-08	1.4e-06	-3.75663	4.31945e-22	1.16631e-20	2.48406	2.06212e-12	2.53835e-10	-2.55139	2.66471e-13	4.37691e-12	AtbHLH159	sequence-specific DNA binding transcription factors
AT2G36220	2.05408	1.55089e-05	0.000560518	-2.05064	1.62843e-05	6.6452e-05	1.78546	0.000522424	0.00904987	-1.80325	0.000395858	0.0014354	AT2G36220	unknown protein; BEST Arabidopsis thaliana protein match is: unknown protein (TAIR:AT3G52710.1); Has 74 Blast hits to 74 proteins in 10 species: Archae - 0; Bacteria - 0; Metazoa - 0; Fungi - 0; Plants - 74; Viruses - 0; Other Eukaryotes - 0 (source /.../ BLink).
AT3G54400	2.05017	2.50339e-07	1.45922e-05	-2.79546	2.96562e-13	3.59344e-12	2.83695	1.41747e-13	2.14943e-11	-2.27114	4.14738e-09	3.85725e-08	T12E18_90	Eukaryotic aspartyl protease family protein
AT1G04430	2.04636	3.3906e-19	9.58808e-17	-2.75168	7.86851e-36	4.41438e-34	1.81028	9.5572e-14	1.46055e-11	-2.13631	2.32214e-21	7.77489e-20	AT1G04430	S-adenosyl-L-methionine-dependent methyltransferases superfamily protein
AT5G04190	2.04573	0.00251251	0.0351685	-10.082	5.23471e-17	9.15134e-16	2.40978	0.000207093	0.00426959	-9.62878	2.52608e-17	6.13233e-16	PKS4	phytochrome kinase substrate 4
AT5G22310	2.03814	9.64185e-07	4.74742e-05	-2.99504	4.56313e-13	5.41009e-12	2.05914	1.20095e-06	5.25757e-05	-2.11927	3.23497e-07	2.23268e-06	AT5G22310	unknown protein; BEST Arabidopsis thaliana protein match is: unknown protein (TAIR:AT3G11590.1); Has 30201 Blast hits to 17322 proteins in 780 species: Archae - 12; Bacteria - 1396; Metazoa - 17338; Fungi - 3422; Plants - 5037; Viruses - 0; Other Eu /.../es - 2996 (source: NCBI BLink).
AT4G16670	2.01024	2.33608e-06	0.000104232	-3.45722	9.93041e-16	1.52797e-14	2.26183	2.95544e-08	1.88553e-06	-2.73194	1.05394e-11	1.41923e-10	AT4G16670	Plant protein of unknown function (DUF828) with plant pleckstrin homology-like region
AT1G02670	2.00975	0.00125022	0.0209464	-3.08669	1.31608e-06	6.54164e-06	1.5233	0.042145	0.237808	-1.81715	0.00412548	0.0112879	AT1G02670	P-loop containing nucleoside triphosphate hydrolases superfamily protein
AT1G14600	1.99987	4.63793e-05	0.00145945	-3.37026	2.38158e-11	2.27774e-10	1.87234	0.000211878	0.00434257	-1.92213	9.147e-05	0.000387705	AT1G14600	Homeodomain-like superfamily protein
