# Supplementary material for: UVR8-mediated inhibition of shade avoidance involves HFR1 stabilization in Arabidopsis
Source: PLoS Genet. 2020 May 11;16(5):e1008797. doi: 10.1371/journal.pgen.1008797 (PMC7241853; doi:10.1371/journal.pgen.1008797)
Supplement: S4 Table — (XLSX) [file pgen.1008797.s009.xlsx]

## Sheet: Table_SX
S4 Table. Oligonucleotide sequences used in this study
Genotyping:	AGI	fw primer	rev primer	rev mutant primer	Reference
uvr8-6	AT5G63860	AGGAGTGATATGCATTC	TCCCAAACTAGACAGACG	LBa1	Favory et al., 2009
hfr1-101	At1G02340	TTAGGATGAATCGGAGGAGTT	ACGGAAAAGACTAGACACTCA	13bp difference between WT and mutant	Duek et al., 2003
hfr1-4	At1G02340	AATAAGGATTCACCCCCACTG	CTAAAATGGGGCTACGGCTAC	LBa1	this work
pil1-6	At2G46970	TTCATGCGAGAACAAGAAAGC	GTCTGAGAAACACACGAAGGC	LBa1	this work
unless otherwise stated for mutant allele genotyping LBa1 sequence was used : TGG TTC ACG TAG TGG GCC
RT-qPCR:	AGI	fw primer	rev primer	Reference
PIL1	AT2G46970	GTGTTTCTCAGACTCAGGCTACTTC	CGGACGCAGACTTTGGGAATTG	Hornitschek et al., 2009
XTR7	AT4G14130	GATGCGTAAGCTACAGCAACTCGT	AGAACCGAAACCTTGTCCGTCTTG	Hornitschek et al., 2009
ATHB2	AT4G16780	GAGGTAGACTGCGAGTTCTTACG	GCATGTAGAACTGAGGAGAGAGC	this work
GH3.3	AT2G23170	GGTCGGGAAAGAGTACGAGC	CTTCCTCCGCACAAACTTGA	this work
IAA29	AT4G32280	CTTCCAAGGGAAAGAGGGTGAC	TTCCGCAAAGATCTTCCATGTAAC	Hornitschek et al., 2012
CKX5	AT1G75450	GGCCCTATTCTTATCTACCC	TTCACCGTCCGTTAAAGC	Hornitschek et al., 2012
YUC8	AT4G28720	GGCGGCTTGTCTCCATGAAC	GATGAACTGACGCTTCGTCG	Hornitschek et al., 2012
FHL	AT5G02200	ATCATAGCGATATCAACGATCC	GTAAGGGTAACAAGTCTGATTC	Hornitschek et al., 2012
PIF4	AT2G43010	CCAGATCATCTCCGACCGGTTTG	CTAGTGGTCCAAACGAGAACCGT	this work
PIF5	AT3G59060	GGGGTACAATCATCTCCATACAT	CCATGTACCTAGCGAGCTGCTCC	this work
PP2A	AT1G69960	TATCGGATGACGATTCTTCGTGCAG	GCTTGGTCGACTATCGGAATGAGAG	this work
CKX5	AT1G75450	GGCCCTATTCTTATCTACCC	TTCACCGTCCGTTAAAGC	Hornitschek et al., 2012
HFR1	AT1G02340	GATGCGTAAGCTACAGCAACTCGT	AGAACCGAAACCTTGTCCGTCTTG	Hornitschek et al., 2009
PIL2	AT3G62090	ACGAGTCAGATGATGCGAGG	TCGTTGTCGTCCTTGTGAGAG	this work
FLP1	AT4G31380	TCTTGGGTGGGAGAGGTACT	TGTCACGGACATGGAAGACG	this work
ST2A	AT5G07010	ACCAACACACAAAGATTCCATTAC	CATCTTCTTCGGCTTTCGGG	this work
HFR1-HA transgene	AT1G02340	CTGCGTATCCAGGTCTTAAGTAG	CTATGGTCTTGTCGAGAACCG	this work
ChIP-qPCR:	AGI	fw primer	rev primer	Reference
ProPIL1_-1417_G-box	AT2G46970	GAATCACGCGGCATTCAC	ACCTTCACGCCATTATTAAGAC	Hornitschek et al., 2009
ProPIL1_+1816_devoid_G-box	AT2G46970	GGGATGAACAATGCACCACCACAA	AAACACACGAAGGCACCACGAATG	Hornitschek et al., 2009
ProXTR7_-197_G-box	AT4G14130	CGCATGCCGGCTGGAATAGATAG	CGACGTGTCACTTCCCTCGTACC	Hornitschek et al., 2009
ProXTR7_-664_devoid_G-box	AT4G14130	TCGAGGTATGATGGGTGTAG	GCTGAGAACACTGAGTACTG	Hornitschek et al., 2009
ProHFR1_-1689_G-box	AT1G02340	ACGTGATGCCCTCGTGATGGAC	GTCGCTCGCTAAGACACCAAC	Hornitschek et al., 2009
ProHFR1_-202_devoid_G-box	AT1G02340	ACGCAACAAACGAACCACAC	AGAGCGATCGGATCAGATAG	Hornitschek et al., 2009
